# Essential conserved neuronal motors kinesin-1 and kinesin-3 regulate A $\beta$ 42 toxicity in vivo

Deepthy Francis<sup>1,2,\*</sup>, Francesco Paonessa<sup>3,4,\*</sup>, Caroline C.G. Fabre<sup>1,\*</sup>, Victoria L. Hewitt<sup>5,6</sup>, Maria E. Giannakou<sup>1,7</sup>, Isabel Peset<sup>1,8</sup>, Alexander J. Whitworth<sup>5</sup>, Frederick J. Livesey<sup>3,9</sup> and Isabel M. Palacios<sup>1,10</sup>

<sup>1</sup> Department of Zoology, University of Cambridge, Downing Street, Cambridge, CB2 3EJ, UK.

<sup>2</sup> Gilead Sciences, Inc, Stockley Park, Uxbridge, UB11 1AF, UK.

<sup>3</sup> The Gurdon Institute, University of Cambridge, Tennis Court Road, Cambridge CB2 1QN, UK.

<sup>4</sup> Intima bioscience, Cambridge, UK.

<sup>5</sup> Medical Research Council, Mitochondrial Biology Unit, Keith Peters Building, Hills Road, Cambridge, CB2 0XY, UK.

<sup>6</sup> University of Auckland, Princes St, Auckland, 1010, NZ.

<sup>7</sup> Royal Society of Chemistry, Milton Road, Cambridge, CB4 0WF, UK.

<sup>8</sup> National Centre Oncology Research, CNIO Madrid, Spain

<sup>9</sup> Zayed Centre for Research Into Rare Disease in Children, Great Ormond Street Institute of Child Health, University College London, UK.

<sup>10</sup> School of Biological and Behavioural Sciences, Queen Mary University of London, E1 4NS, UK.

Corresponding author: [i.palacios@qmul.ac.uk](mailto:i.palacios@qmul.ac.uk)

\* Equal contribution

**Funding:** DF and IP by the BBSRC, CCGF by ARUK and Isaac Newton Trust fellowship, VLH by EMBO Long-Term Fellowship (ALTF 740- 2015) and co-funded by the European Commission FP7 (Marie Curie Actions, LTFCOFUND2013, GA-2013-609409), MEG by ARUK, AW by MRC (MC-UU-00028/06) and ERC Starting grant (309742), FP and FJL by Wellcome Trust, IMP by ARUK, BBSRC, the Wellcome Trust, and Queen Mary University of London.

**Author contributions statement.** DF, FP, CCGF, and IMP designed and performed experiments, analysed data, and wrote the paper. VLH designed and performed experiments and analysed data. MEG and IP performed experiments and analysed data. AW contributed to conceptualisation and project supervision. FJL designed experiments and contributed to conceptualisation and project supervision.

## Abstract

Alzheimer's Disease is the leading cause of dementia and the most common neurodegenerative disorder. Understanding the molecular pathology of Alzheimer's Disease may help identify new ways to reduce neuronal damage. In the past decades *Drosophila* has become a powerful tool in modelling mechanisms underlying human diseases. Here we investigate how the expression of the human 42-residue  $\beta$ -amyloid (A $\beta$ ) carrying the E22G pathogenic "Arctic" mutation (A $\beta$ <sub>42Arc</sub>) affects axonal health and behaviour of *Drosophila*. We find that A $\beta$ <sub>42Arc</sub> flies present aberrant neurons, with altered axonal transport of mitochondrial and an increased number of terminal boutons at neuromuscular junctions. We demonstrate that the major axonal motor proteins kinesin-1 and kinesin-3 are essential for the correct development of neurons in *Drosophila* larvae and similar findings are replicated in human iPSC-derived cortical neurons. We then show that the over-expression of kinesin-1 or kinesin-3 restores the correct number of terminal boutons in A $\beta$ <sub>42Arc</sub> expressing neurons and that this is associated with a rescue of the overall neuronal function, measured by negative geotaxis locomotor behavioural assay. We therefore provide new evidence in understanding the mechanisms of axonal transport defects in Alzheimer's Disease, and our results indicate that kinesins should be considered as potential drug targets to help reduce dementia-associated disorders.

**Key words:** Alzheimer's Disease, amyloid beta, neurodegeneration, axonal transport, motor proteins, *Drosophila* neurons, human neurons, iPSC.

## Introduction

Alzheimer's Disease (AD) is the leading cause of dementia and the most common neurodegenerative disorder. Age is a major risk factor for AD, but genetic studies show that the amyloid precursor protein (APP) and its processing play a critical role in AD<sup>1,2</sup>. Neurons process APP through the amyloidogenic pathway where the protein is sequentially cleaved by  $\beta$ -secretase ( $\beta$  site APP cleaving enzyme BACE) and  $\gamma$ -secretase (with the catalytic subunit presenilin). Processing by these two enzymes generates the peptide  $A\beta_{1-40}$  and the more toxic peptide  $A\beta_{1-42}$  ( $A\beta_{42}$  from hereon). In Alzheimer's disease and other dementias,  $A\beta_{42}$  oligomerises and forms aggregates in the extracellular space, which ultimately form the macroscopic plaques that are a main hallmark of AD pathology. This deposition of extracellular  $A\beta$  oligomers has been widely associated with detrimental effects on cellular physiology, such as disruption of the microtubule cytoskeleton<sup>3,4</sup> and impairment of axonal transport<sup>5-8</sup>. In the last two decades, the fruit fly *Drosophila melanogaster* has been used as a model for AD studies, where two different  $A\beta$  proteotoxicity models have been investigated: APP/presenilin/BACE-expressing transgenic flies, which exhibit age-dependent AD-like pathology and behavioural changes as a consequence<sup>9-14</sup>, or human  $A\beta$  expressing flies. One specific fly model relies on the human  $A\beta_{42}$  with the "Arctic" E22G mutation ( $A\beta_{42Arc}$  from hereon), which causes an aggressive form of familial AD<sup>15</sup>. The expression of  $A\beta_{42Arc}$  in this humanised *Drosophila* line results in a severe form of neurodegeneration, associated with progressive locomotor deficits, brain vacuolation and premature death of the animals<sup>9,16</sup>.

It has been argued that  $A\beta$  may also affect neuronal physiology through the disruption of intracellular processes, for example by disrupting microtubule-based axonal transport<sup>17,18</sup>. Neurons are critically dependent on intracellular transport of components and genetic mutations in the transport machinery are linked to axonopathy and neurodegeneration<sup>19,20</sup>. Axonal transport is facilitated by microtubule motors, with kinesin-1 (KIF5 motors in mammals, and kin1 from hereon) and kinesin-3 (KIF1 motors in mammals, and kin3 from hereon) mediating anterograde transport from the cell body to distal parts of the axon of various cargoes such as mitochondria and vesicles. Recent work suggests a close association between  $A\beta$  toxicity and the loss of the mammalian neuronal kin1 KIF5A<sup>21</sup>, that is likely the major motor for APP vesicle transport<sup>18,22-24</sup>. However, it is unknown if increasing the activity of transport kinesins, such as kin1 and kin3, leads to a rescue of AD symptoms. Since axonal transport and  $A\beta$  toxicity are conserved in humans and flies, a better understanding of these mechanisms using humanised *Drosophila* could help with human studies<sup>25-27</sup>. The reason for using humanised flies is that it constitutes a cost-effective, fast model system with powerful genetics to address mechanistic questions. In addition, key proteins in our study, such as kinesins, are encoded by a single gene in *Drosophila*, contrary to mammals, facilitating functional analysis and gene manipulations.

In this work, we used the humanised  $A\beta_{42Arc}$  flies and human iPSCs-derived neurons to further explore the link between pathological  $A\beta$  peptides, axonal transport, and neurodegeneration. We demonstrate that the depletion of kin1 and kin3 from motor neurons (MNs) in *Drosophila* larvae led to their death, and we obtained similar results in human iPSC-derived cortical neurons depleted of the kin1 and kin3 ortholog genes. Expression of the pathologic form of human  $A\beta_{42Arc}$  in *Drosophila* MNs inhibits mitochondrial transport in the distal axons. The flies expressing  $A\beta_{42Arc}$  in MNs also showed aberrant neuromuscular junction (NMJ) synapses, with increased number of terminal boutons, a phenotype which was rescued by the over-expression of kin1 and kin3. Flies expressing  $A\beta_{42Arc}$  in MNs also showed reduced climbing activity, a typical behaviour linked to neuronal health, and used as a common read-out for neuronal toxicity in flies. We observed a rescue of this phenotype when kin1 or kin3 were over-expressed in the same neurons. We propose that modulation of kin1 and kin3 activity may represent a promising target for pharmacological intervention in AD.

## Results

### **kin1 and kin3 are essential for survival of motor neurons in *Drosophila melanogaster***

To study the relationship between kinesins and neurodegeneration, we first analysed whether kin1 and kin3 are required for neuronal survival. We obtained larvae with a subset of MNs lacking kin3 (*imac*<sup>170</sup> allele with the mutation W58term<sup>28</sup>) or lacking the motor subunit of kin1 (*Khc*<sup>27</sup> null allele<sup>29</sup>). This was achieved by clonal induction using the MARCM system (Mosaic Analysis with a Repressible Cell Marker<sup>30</sup>), so that any mutant MN lacking kin1 or kin3 is labelled with myristoylated-RFP (myr-RFP, a lipid-modified reporter protein). Our MARCM approach allows for the cell body, dendrites, axons and NMJs of the mutant MNs to be visualised in live animals (Supplementary Figure S1). The viability of those mutant MNs was then monitored as the larvae developed from second instar larvae L2 (~first instar larvae L1+24h) to third instar larvae L3 (~L2+48h) by quantifying the number of L2 animals exhibiting mutant myr-RFP positive neurons, and then screening the same animals for the presence of those neurons at L3 stage (Figure 1). Quantification of larvae containing *Khc*<sup>27</sup> MNs shows that only 37% (n=23; p<0.0001) of the larvae displayed myr-RFP positive *Khc*<sup>27</sup> mutant MNs at the L3 stage, compared to the L2 stage (Figure 1B). For larvae with *imac*<sup>170</sup> MNs, 73% (n=22; p<0.001) of the larvae displayed myr-RFP positive *imac*<sup>170</sup> mutant neurons at the L3 stage, compared to the L2 stage (Figure 1B). Thus, a significant number of mutant neurons present at stage L2 were lost during the L2-to-L3 development of the larvae. No loss of induced mutant clones over time was observed in the control clones (n=27, controls are MARCM clones without any *kin* mutation associated). These experiments show that in the developing nervous system, neurons lacking kin1 or kin3 disappear as the larvae grow from L2 to L3. This finding indicates that kin1 and kin3 are essential for the survival of developing MNs.

We then investigated whether re-expressing kin1 or kin3 in *kin1* (i.e., *Khc*<sup>27</sup>) and *kin3* (i.e., *imac*<sup>170</sup>) mutant neurons could restore their viability. This was achieved by driving the expression of UAS-kin1-GFP or UAS-kin3-GFP in the MARCM clones (Figure 1B). We observed that the expression of Kin1-GFP or Kin3-GFP in *kin1* or *kin3* mutant clones, respectively, showed a complete elimination of neuronal death (100%, n=24 for kin1 and 100%, n=19 for kin3). Surprisingly, over-expression of Kin1-GFP in *kin3* mutant neurons eliminated neuronal death in 91.6% of the animals (n=24), and over-expression of Kin3-GFP in *kin1* mutant neurons also eliminated death in 100% of the animals (n=19), suggesting that motors may act in a redundant or concerted manner, and supporting the recent findings that the concerted action of a kin1 and a kin3 promotes efficient secretory vesicle transport<sup>31</sup>.

### **Depletion of kin1 and kin3 represses the development of human iPSC-derived cortical neurons.**

To decipher whether kin1 and kin3 are also essential for neuronal survival in humans, we investigated the role of these two kinesins in the development of human iPSC-derived cortical neurons. For this purpose, we generated human cortical neurons from a control iPSC line using a well-established protocol<sup>32</sup>. We initially characterised the expression and localisation of KIF5A (human ortholog of kin1) and KIF1A (human ortholog of kin3 and a major mammalian neuronal kinesin) in mature iPSC-derived cortical neurons. Immunohistochemistry showed that KIF1A and KIF5A are expressed in human neurons and are found in processes with punctate pattern suggestive of cargoes (Figure 2A).

Next, we wanted to test whether kinesins are required for the correct maturation of human cortical neurons. In healthy conditions, iPSCs give rise to neural progenitor in 25 days. Progenitor cells initially generate cortical rosettes, a structure morphologically like the developing neural tube, that gradually expand their size becoming visible clumps that generate post-mitotic cortical neurons able to develop an intricate and functional network<sup>33</sup>. We thus measured the ability of

cortical progenitors to form clumps and generate a complex neuronal net in absence of kinesins. Progenitor cells were infected with lentiviral vectors encoding shRNAs for KIF1A and KIF5A, reducing the expression of either (sh KIF1; sh KIF5A) or both (sh KIF1A/5A) motor proteins (Figure 2B-D; Supplementary Figures S2 and S3). Sh KIF1A/5A cells showed a dramatic decrease of the size of neuronal clumps when compared to control, as well as a reduction in the area covered by neuronal processes, highlighted by the presence of large void areas between neurogenic clumps (Figure 2C-D). This was confirmed by quantification, showing fewer cells in areas between neuronal clumps (Supplementary Figure S2A-B). This suggests that a simultaneous depletion of KIF1A and KIF5A alters the neurogenic potential of human iPSC-derived cortical progenitors, consistent with the results we obtained in *Drosophila* MNs. Single shRNAs for just KIF1A or just KIF5A did not result in a decrease of the size of neuronal clumps, nor in a reduction in the area covered by neuronal processes, which further supports some redundancy of these two motors in neurons (Supplementary Figure S3A-B).

As iPSC-derived cortical neurons depleted for both KIF1A and KIF5A seem unable to develop and differentiate as efficiently as control cells, and as axonal transport is linked to neuronal health, we hypothesised that over-expressing these microtubule motors in degenerating neurons may rescue some of their pathological defects. To test this, we analysed whether increased kinesin levels might improve survival in neuronal cells originated from patients affected from familial AD, and whether increased kinesin levels could reduce the toxicity of tau (a key component of the AD neurofibrillary tangles) and A $\beta$ . To do so, we generated neurons starting from iPSCs derived from Down's syndrome individuals (DSiPS). Down's syndrome is a genetic condition resulting from having three copies of chromosome 21. Since APP is localised on the chromosome 21, this results in having three copies of the APP gene<sup>34</sup> commonly linked with AD-like dementia<sup>35</sup> and DSiPS neurons reproduce features of AD such as increased A $\beta$  levels and the presence of toxic fragments of extracellular tau<sup>36-38</sup>. Results showed that overexpression of both KIF1A or KIF5A in DSiPS neurons (obtained by lentivirus infection) did not decrease the levels of tau (Supplementary Figure S4A). In addition,  $\beta$ 42/ $\beta$ 40 and  $\beta$ 38/ $\beta$ 40 ratios were measured in the media from the KIF1A or KIF5A overexpressing DSiPS cells, and no difference was observed compared to ratios measured in DSiPS cells (Supplementary Figure S4B).

### **A $\beta$ <sub>42Arc</sub> expression affects axonal transport of mitochondria in *Drosophila*.**

To investigate the hypothesis that over-expressing these kinesins in degenerating neurons may rescue some of their pathological defects in *Drosophila*, we first analysed pathological defects in the A $\beta$ <sub>42Arc</sub> fly model that may be linked to kinesin function, such as the transport of mitochondria. Previous *Drosophila* work demonstrated that over-expression of hAPP and hBACE, or A $\beta$ <sub>42</sub> (wildtype or Arc) alters mitochondria localisation in MNs<sup>14,39,40</sup>. To explore whether the APP mutation A $\beta$ <sub>42Arc</sub> affects mitochondria axonal transport, we generated transgenic flies expressing both Mito-GFP and the human A $\beta$ <sub>42Arc</sub> peptide under the control of the *ccap-Gal4* driver, as a mean to mis-express in a small number of neurons, including a few efferent axons that could be readily imaged in peripheral nerves. This genetic combination allowed us to do precise imaging of mitochondrial transport and distribution in a single axon per peripheral segmental nerve *in vivo* in L3 larvae, an ideal developmental stage for transport studies<sup>19,41</sup> (Figure 3, see materials and methods for details). To test whether the A $\beta$ <sub>42Arc</sub> expression affects the total number of mitochondria present in the segmental nerves, we quantified the total number of mitochondria using the kymograph generated from individual time points taken from our movies. We selected segmental nerves where we could easily monitor Mito-GFP, starting from the proximity of the ventral nerve cord (VNC) to the distal regions (Figure 3A). We did not observe a significant difference in the average total number of mitochondria per ROI in A $\beta$ <sub>42Arc</sub> expressing axons (8.1 $\pm$ 0.8, n=21) compared with control axons (expressing only the Mito-GFP, 9.3 $\pm$ 0.6, n=24)



(Figure 3B). This result confirms that  $A\beta_{42Arc}$  expression did not cause a reduction in mitochondrial number in the segmental nerves.

We then quantified mitochondria dynamics in control (n=24) and in the  $A\beta_{42Arc}$  expressing neurons (n=23, and  $A\beta_{42Arc}$  neurons from here on). We were able to distinguish three discrete categories of mitochondria based on their movement - anterograde, retrograde, and stationary (Figure 3A) - and we quantified the proportions of mitochondria moving along the axons (Figure 3C). These experiments allowed us to detect that neurons from the  $A\beta_{42Arc}$  mis-expression mutants showed a significant increase in the stationary fraction of mitochondria (control: 47±4%;  $A\beta_{42Arc}$ : 70±3%,  $p<0.00001$ ), as well as a decrease in both the anterograde (control: 28±3%;  $A\beta_{42Arc}$ : 15.4±2%,  $p<0.001$ ) and retrograde (control: 25±3%;  $A\beta_{42Arc}$ : 15±3%,  $p<0.001$ ) fractions, as compared to controls (Figure 3C). This result indicates that expression of a pathologic form of human APP inhibits mitochondrial transport in *Drosophila* MNs.

We then sought to verify whether the increased number of stationary mitochondria observed in axons of  $A\beta_{42Arc}$  neurons was related to a drop in the speed of the moving organelles in these MNs. To quantify this, we tracked moving mitochondria and calculated their average velocity. We did not detect any significant difference in the mitochondrial velocity in the  $A\beta_{42Arc}$  expressing axons (anterograde, 0.9±0.1  $\mu\text{m/s}$ , n=7 movies; retrograde 1.2±0.2  $\mu\text{m/s}$ , n=7 movies) compared to controls (anterograde, 0.9±0.1  $\mu\text{m/s}$ , n=5 movies; retrograde, 0.8±0.1  $\mu\text{m/s}$ , n=5 movies). This result indicates that  $A\beta_{42Arc}$  expression did not cause a significant change in the average velocity of anterograde and retrograde mitochondria in the segmental nerves, although there is a tendency towards higher velocity in the retrograde fraction of mitochondria. This finding suggests that although the fraction of moving mitochondria in  $A\beta_{42Arc}$  axons is reduced, those mitochondria that move do it at the normal rate.

### **$A\beta_{42Arc}$ expression in MNs results in an increased number of Type Ib boutons.**

Several lines of evidence indicate that synapse dysfunction is part of the cellular basis of cognitive defects in AD<sup>1,14,42,43</sup>. We explored whether the link between  $A\beta_{42Arc}$  expression and mitochondrial transport had any effect on synapse development in L3 larvae, an ideal system to also study synaptic features<sup>39,44</sup>. We analysed synapse formation using the NMJs of segment A3 muscle 6/7 (NMJ6/7 from hereon), which is a common and well-established system for the study of synapse formation and is exclusively innervated by Type I boutons<sup>45</sup> (Figure 4). We expressed  $A\beta_{42Arc}$  specifically in the MNs under the control of a Gal4 driver for glutamatergic neurons, including all MNs (OK371-Gal4) and we studied the morphology of the NMJ by confocal microscopy. We observed an increase in the average number of total boutons in  $A\beta_{42Arc}$  larvae (148±6, n=43) compared to the control OK371-Gal4 larvae (101±3, n=21;  $p<0.0001$ ) Figure 4A and B). Type I boutons are subdivided into Type I big and small (Ib and Is) boutons, differing in size, morphology, physiology, and the amount of subsynaptic reticulum that surrounds them<sup>39,46,47</sup>.  $A\beta_{42Arc}$  larvae showed a significant increase in Type Ib boutons (37±2.6, n=20) compared to controls (29±2, n=20;  $p<0.05$ ; Figure 5, left). However, we did not observe any significant difference in Type Is boutons ( $A\beta_{42Arc}$ : 72±4, n=20 and control: 67±3, n=20; Figure 5, right). This finding is consistent with previous work reporting a significant increase in the number of Type Ib boutons in APP and APPL (*Drosophila* APP homologue) over-expressing neurons<sup>39</sup>. We then studied the presence of Bruchpilot (Brp), a protein specifically localised to the presynaptic release sites where synaptic vesicles fuse to the presynaptic membrane. We did not observe any significant difference in the total number of Brp puncta per NMJ from  $A\beta_{42Arc}$  larvae (604±22, n= 14) compared to the control (673±3, n=18) (Supplementary Figure S5A-B), consistent with the APP and BACE over-expression *Drosophila* models. Our results show that there is a significant increase in the number of boutons in MNs expressing the human  $A\beta_{42Arc}$ .

### **kin1 or kin3 over-expression rescues the higher bouton number observed in $A\beta_{42Arc}$ expressing MNs.**

To investigate whether the increased number of boutons observed in  $A\beta_{42Arc}$  NMJ6/7 is in any way related to kinesin activity and axonal transport, we analysed whether kin1 or kin3 over-expression might rescue this bouton specific  $A\beta_{42Arc}$  phenotype. To analyse this, kin1 or kin3 were over-expressed in conjunction with  $A\beta_{42Arc}$  in the larval MNs by using the OK371-Gal4 driver (Figure 4; see materials and methods for details). We studied the synaptic bouton numbers at NMJ6/7, and found that both kin1 ( $88\pm 6$ ,  $n=22$ ) and kin3 ( $105\pm 6.6$ ,  $n=18$ ) over-expression significantly suppressed the  $A\beta_{42Arc}$  induced bouton increase ( $148\pm 6$ ,  $n=43$ ) (Figure 4B).

Interestingly, we noticed that the average number of boutons present in the kin1 or kin3 over-expressing larvae was similar to the number of boutons in the control ( $101\pm 3$ ,  $n=21$ , Figure 4B). We previously found no clear rescue of mitochondria transport by over-expressing kin1 or kin3. Thus, the restoration of NMJ6/7 boutons number upon higher levels of kin1 and kin3 seems not to be linked to mitochondria transport. However, it is important to keep in mind that the experiments for imaging mitochondria within a single axon *versus* the bouton rescue experiments described above required two different Gal4 drivers, which may result in different levels of expression of the motor proteins.

### **Over-expression of kin1 or kin3 rescues locomotion defects in $A\beta_{42Arc}$ *Drosophila*.**

To further investigate the relationship between  $A\beta$  toxicity and kinesins, we analysed how increased levels of kin1 and kin3 would impact the neurodegeneration-linked behaviour observed in our  $A\beta$  toxicity fly model. To test this, we drove the expression of  $A\beta_{42Arc}$  under the control of the pan-neuronal driver Elav-Gal4, which has been shown to recapitulate some of the AD pathologies. We chose the well-assessed method of negative geotaxis<sup>48</sup> - the ability of the flies to climb against gravity - to verify age-related neurodegeneration. Analysis of the climbing capacity of the  $A\beta_{42Arc}$  flies conducted for a period of 20 days (5-25 days old flies) revealed progressive locomotion defects, with a clear drop in climbing capacity already at day 15 (Figure 6).

We then generated flies over-expressing kin1 or kin3 in the same neurons that expressed  $A\beta_{42Arc}$  and analysed the climbing ability of these flies. At day 15 we already observed a significant rescue in climbing ability when either kin1 or kin3 were over-expressed in the  $A\beta_{42Arc}$  neurons, compared to controls (Figure 6). Flies that over-expressed kin1 and  $A\beta_{42Arc}$  performed as control until 15 days of age, and then performed with a significantly higher performance index than  $A\beta_{42Arc}$  flies at 25 days (Figure 6). Similar results were observed when kin3 was over-expressed in neurons of the  $A\beta_{42Arc}$  flies, with a significant rescue of climbing defects from day 15 (Figure 6). Contrary to the over-expression of the two motors, the expression of just GFP (UAS-GFP) did not rescue the climbing performance defects when co-expressed with  $A\beta_{42Arc}$  (Figure 6). This is in accordance with previous reports on another UAS construct (UAS-Glut) that does not alter  $A\beta_{42Arc}$  protein or mRNA levels compared to controls<sup>49</sup>. Contrary to the expression of the full length kin1, the expression of Khc1-849 (kin1 motor subunit Khc lacking the last 850-975 amino acids) did not rescue the climbing performance defects when co-expressed with  $A\beta_{42Arc}$  (Figure 6). Moreover, the expression of Khc1-849 seemed to reduce the climbing performance index of the  $A\beta_{42Arc}$  flies at 15 days ( $A\beta_{42Arc}$  vs  $A\beta_{42Arc}$  + Kin1-849 \*). This suggests that kin1 requires its tail, cargo-binding region to rescue negative geotaxis in this  $A\beta_{42Arc}$  AD fly model. These results suggest that an increase in kin1 or kin3 levels can reduce the neurodegeneration that the human  $A\beta_{42Arc}$  induced in *Drosophila*.

### **Discussion**

Due to the length of axons, microtubule based axonal transport is crucial in maintaining the required supply of cargoes from soma to terminals (anterograde), and from terminals to soma (retrograde). This transport is also likely to be required for clearance of aggregates to maintain

neuronal health. Here we show that major transport microtubule motors KIF1A and KIF5A are expressed in human iPSC-derived neurons and are found in processes with punctate pattern suggestive of cargoes. We also show that these kin1 and kin3 motors are essential for survival of MNs both in *Drosophila* and in human iPSC-derived neurons. Such essential function of these motors correlates well with the fact that mutations in KIF5A can cause hereditary spastic paraplegia<sup>50,51</sup>, neonatal intractable myoclonus<sup>52</sup>, axonal Charcot-Marie-Tooth disease<sup>53</sup> or amyotrophic lateral sclerosis<sup>54</sup>, while KIF1A variants are linked to a wide range of neurodegenerative disorders<sup>55,56</sup>. In animal models, KIF1A knockout (KO) mice die perinatally and have defects in the transport of synaptic vesicle precursors<sup>57</sup>, while KIF1A-haploinsufficient animals suffer from sensory neuropathy and reduced TrkA neurons<sup>58</sup>. In zebrafish, peripheral axons have defective mitochondrial transport and degenerate in KIF5A mutants<sup>59</sup>, while a KIF5A conditional KO mouse display sensory neuron degeneration and seizures, and die soon after birth<sup>60,61</sup>. In *Drosophila*, *kin1* mutant larvae accumulate axonal cargos in “traffic jams” in the peripheral nerves, which could contribute to neuronal death, as we observed here, and mutations in *Drosophila* *kin3* result in neuronal atrophy<sup>62</sup>.

From a more technical point of view, our MARCM approach offered a unique opportunity to study kinesin function in developing neurons using null alleles of *kin1* and *kin3*, in an otherwise heterozygous animal. Since kinesin homozygous mutants are lethal in mice, zebrafish, and *Drosophila*, most previous studies have been conducted in either heterozygous individuals or hypomorphs<sup>59,63,64</sup>. Our approach allows to create null mutations of *kin1* and *kin3* in the dividing neuronal populations in a manner that the cell body, axon, dendrite or VNC lacking these molecular motors can be marked and easily identified, allowing us to follow viability of these mutant neurons *in vivo*.

To investigate further whether the neuronal death we observed in *kin1* or *kin3* mutant larvae is due to the absence of kinesins, we studied whether we could rescue this mutant phenotype by overexpression of Kin1 or Kin3. Kin1 overexpression in *kin1* mutants and Kin3 overexpression in *kin3* mutants rescued the neuronal death phenotype in larvae. Interestingly, overexpression of Kin1 in *kin3* mutants, or Kin3 in *kin1* mutants also displayed a rescue of neuronal death at the L3 stage. A possible explanation for the rescue of neuronal death observed in neurons mutant for one kinesin by overexpression of the other motor is that each kinesin may be able to take over the function of the other motor in its absence, supporting the recent findings that the concerted action of *kin1* and *kin3* motors promotes efficient vesicle transport<sup>31</sup>. This is also in agreement with the observation that the levels of Khc (motor subunit of KIF5) increased in KIF1A (*kin3*) homozygous mutant mice, further suggesting that *kin1* motors might partially compensate for the function of KIF1A in *kif1a* mutants<sup>57</sup>. This compensation has also been suggested in zebrafish peripheral axons, where KIF5A has a role in maintenance that is only required when KIF1B is lost. Conversely, an axonal maintenance role of KIF1B is only necessary when KIF5A is reduced<sup>59</sup>.

Our studies using human iPSC-derived cortical neurons show that the simultaneous depletion of KIF1A and KIF5A resulted in a decrease of the size of neuronal clumps, as well as fewer cells and neurites in areas between neuronal clumps. This suggests that the neurogenic potential of the progenitors or neurite outgrowth are reduced without KIF1A and KIF5A, which indicates a conserved requirement for *kin1* and *kin3* in neuronal development across species, including humans. In addition, the hypothesis of a concerted and partially redundant action of kinesins in neurons is further supported by our finding in iPSC-derived neurons, where the infection of the iPSCs with lentiviral vectors encoding the shRNA for KIF1A (KIF1A<sup>sh</sup>) or for KIF5A (KIF5A<sup>sh</sup>) did not result in a decrease of the size of neuronal clumps, or in a reduction in the area covered by neuronal processes. This is in contrast with the cells expressing both KIF1A<sup>sh</sup>:KIF5A<sup>sh</sup>, which showed a dramatic decrease of the size of neuronal clumps, nor in a reduction of the area covered by neuronal processes. Although Kinesins appear to show aspects of functional redundancy for neuronal transport, and one KIF may take over the function of another KIF in its

absence, previous work shows that Kinesins are not completely redundant, with distinct mutant phenotypes being described in mice and humans<sup>65,66</sup>. Related to this, work in zebrafish indicates that the role of KIF1B and KIF5A in peripheral sensory axon maintenance involves mitochondrial-dependent and mitochondrial-independent mechanisms<sup>59</sup>.

We find not only that kin1 and kin3 are essential for the survival of *Drosophila* and human neurons, but our behavioural and cell biological experiments show that increased kin1 and kin3 levels compensate for some of the inhibitory effects of expressing a pathologic form of human APP in *Drosophila*. Although the effectiveness of kinesin-mediated transport in AD still needs to be determined, there are various findings stressing that maintenance of axonal transport by upregulation of kinesins may help maintain the normal metabolism of diseased neurons, and thereby neuronal viability. Related to this, we have found that the loss of kin1 or kin3 induces neuronal death in larvae, that the expression of A $\beta$ <sub>42Arc</sub> by the pan-neuronal driver Elav-Gal4 results in reduced negative geotaxis (with age-related neurodegeneration), and that the over-expression of kinesins in the A $\beta$ <sub>42Arc</sub> neurons was able to rescue these phenotypes. Together, these results suggest that higher kinesin levels rescue A $\beta$ <sub>42Arc</sub>-induced neurodegeneration. In addition, reduction of the dosage of the microtubule minus-end directed motor Dynein suppressed neuronal death caused by expressing human APP in flies, while reduction of kin1 enhanced axonal cargo accumulations in these humanised flies<sup>67</sup>. Also, transcriptome analysis revealed kinesin light chain (Klc)-1 splicing as an A $\beta$  accumulation modifier in mice<sup>68</sup>, and the levels of various motors (KIF5A, KIF1B AND KIF21B) are increased in AD patient samples<sup>69,70</sup>. Together, this suggests a model in which kinesins are upregulated in AD neurons as a plastic response to the reduced activity of these motors in the diseased neurons, and thus to the reduction of cargo transport. In addition, upregulation of kinesins may ameliorate the damaging effects of intracellular protein aggregates through increased intraneuronal transport<sup>70</sup>. An idea that we can only speculate on is the possibility that a general increase in axonal transport, which would be achieved by increasing the activity of various kinesins, could change the biophysical properties of the axoplasm (e.g., reducing crowding and viscosity) in a way that may increase neuronal health. This is supported by our findings that overexpression of Kin1 in *kin3* mutant larvae, or Kin3 in *kin1* mutant larvae rescued neuronal death, and that increasing either Kin1 or Kin3 levels compensate for some of the inhibitory effects of expressing A $\beta$ <sub>42Arc</sub> in *Drosophila*. This agrees with reports showing that increased KIF11 expression can improve cognitive performance of an AD mouse model<sup>71</sup>.

The precise relationship between neurodegeneration and the function of kinesins as cargo transporters remains elusive. It is likely that the transport of specific cargoes by Kin1 and Kin3 - such as synaptic vesicles and mitochondria - plays an important role in both the essential function of these motors in neuronal survival, and in the rescue of A $\beta$ <sub>42Arc</sub> neuronal toxicity through their higher activity. This correlates both with the fact that neurons affected in AD follow a dying-back pattern of degeneration, where axonal disruption and synaptic loss precede neuronal cell death<sup>72-74</sup>, and with our observation that higher levels of Kin1 and Kin3 rescue the bouton number phenotype observed in A $\beta$ <sub>42Arc</sub> neurons. Expression of A $\beta$ <sub>42Arc</sub> in MNs resulted in morphologically distinct NMJs, characterised by an increase in boutons, similar to what it was reported in larvae expressing human APP or human BACE<sup>39</sup>, or over-expressing *Drosophila* APPL<sup>67,75,76</sup>. The aberrant morphology of boutons suggests that although the number of boutons is higher, they are likely dysfunctional, correlating with A $\beta$ <sub>42Arc</sub> enhancing synaptic transmission fatigue<sup>14</sup>. In our assay, increasing axonal transport by over-expressing kin1 and kin3 in the neurons that also express human A $\beta$ <sub>42Arc</sub> allows for these axons to develop proper bouton number and normalised morphology. This result, together with the rescue of climbing capacities of adults when kin1 and kin3 are over-expressed in A $\beta$ <sub>42Arc</sub> neurons, suggests that higher kinesin levels also rescue the functionality of the NMJ. As previously suggested, NMJ defects may lead to reduced connectivity and innervation of those neurons and their targeted muscles, which ultimately causes locomotion defects. This model fits with our finding that the overexpression of kinesins in A $\beta$ <sub>42Arc</sub> neurons

rescues both bouton morphology and animal climbing capacity. However, as boutons are analysed in larvae, while negative geotaxis is used as a readout of neurodegeneration is performed in aging adults, it is difficult to conclude on the relationship between these two processes and the function of kinesins as axonal transport motors in degenerating neurons. One possibility is that kinesins rescue the reduced axonal transport of mitochondria in  $A\beta_{42Arc}$  neurons, resulting in a proper number of functional mitochondria reaching the synapses. This hypothesis aligns with the idea that  $A\beta$  probably disrupts synaptic function by affecting presynaptic mitochondria<sup>77</sup>. In  $A\beta_{42Arc}$  larvae, we failed to rescue reproducibly the mitochondria transport defects by overexpressing the kinesins. However, it is still possible that the over-expression of kin1 and kin3 helps the axonal transport of mitochondria in adults and this may contribute to improving the age-associated locomotor activity of  $A\beta_{42Arc}$  flies. What our results show from the mechanistical point of view is that the tail region of Kin1 is required to rescue the neuronal dysfunction observed in  $A\beta_{42Arc}$  mutants. The tail region (amino acids 850-975 in *Drosophila*) is a conserved region and acts as an alternative cargo binding domain to the Klc cargo-binding domain in oocytes<sup>78,79</sup>, in mitochondria axonal transport<sup>80</sup>, and in mitochondria density in sensory neurons<sup>59</sup>.

This work sheds light into the association between the activity of the major microtubule transport motors kin1 and kin3 and  $A\beta$  neuronal toxicity. It could be argued that novel AD therapeutic strategies based on enhancing the activity of microtubule anterograde motors should be pursued. While it was previously shown that reducing KIF5B ameliorates the phenotypes in a tauopathy mouse model<sup>81</sup>, excess of motor activity, however, can lead to transport defects<sup>79</sup>. Hence, it appears that maintaining the proper balance of kinesin activity is crucial for neuronal health and may aid in mitigating AD pathogenesis.

## Materials and Methods

### Resources table

| Reagent or resource                                                  | Source, reference and Identifier           |
|----------------------------------------------------------------------|--------------------------------------------|
| <b>Antibodies</b>                                                    |                                            |
| Mouse anti-Bruchpilot (1:50)                                         | Developmental Studies Hybridoma Bank, NC82 |
| Alexa Fluor® 594 AffiniPure Goat Anti-Horseradish Peroxidase (1:200) | Jackson Immuno Research, 123-585-021       |
| Chicken anti-GFP (1:2000)                                            | Abcam, Ab13970                             |
| CF®405M Phalloidin                                                   | Biotium, 00034-T                           |
| DyLight® 488 Goat Anti-Chicken                                       | Abcam, Ab96951                             |
| DAPI (1:5000)                                                        | Sigma, D9542                               |
| Mouse anti- $\beta$ 3-tubulin (1:3000)                               | BioLegends, MMS-435P                       |
| Mouse anti-Actin (1:10000)                                           | Sigma, A2228                               |
| Rabbit anti-Tau (total) (1:10000)                                    | Dako Cytomation, A0024                     |
| Rabbit anti-KIF1A (1:1000)                                           | Abcam, Ab180153                            |
| Rabbit anti-KIF5A (1:1000)                                           | Abcam, Ab5628                              |
| IRDye 680 RD donkey anti-mouse                                       | LI-COR bioscience, 925-68072               |
| IRDye 800 CW donkey anti-rabbit                                      | LI-COR bioscience, 926-32213               |
| Alexa Fluor® 488 Goat Anti-Rabbit                                    | Thermofisher scientific, A21206            |
| Alexa Fluor® 594 Goat Anti-Rabbit                                    | Thermofisher scientific, Ab150092          |
| Alexa Fluor® 488 Goat Anti-Mouse                                     | Thermofisher scientific, A-11001           |
| <b><i>Drosophila</i> strains</b>                                     |                                            |
| <b>Climbing assays</b>                                               |                                            |



|                                                                                                                                                                                                                                                                                                                                                                                                                                                                                                                                                                                                                                                                      |                                                                                                                                    |
|----------------------------------------------------------------------------------------------------------------------------------------------------------------------------------------------------------------------------------------------------------------------------------------------------------------------------------------------------------------------------------------------------------------------------------------------------------------------------------------------------------------------------------------------------------------------------------------------------------------------------------------------------------------------|------------------------------------------------------------------------------------------------------------------------------------|
| <i>Elav-Gal4155/w-; UAS-51D/UAS-51D (with no Aβ)</i>                                                                                                                                                                                                                                                                                                                                                                                                                                                                                                                                                                                                                 | Bloomington BL458 and Bischof et al., 2007                                                                                         |
| <i>UAS-GFP and UAS-Aβ<sub>42Arc</sub></i>                                                                                                                                                                                                                                                                                                                                                                                                                                                                                                                                                                                                                            | Gift from Damian Crowther, Jahn et al., 2011                                                                                       |
| <i>UAS-kin-1 (3LY-GFP)</i>                                                                                                                                                                                                                                                                                                                                                                                                                                                                                                                                                                                                                                           | Palacios lab                                                                                                                       |
| <i>UAS-kin-3 (UNC104-GFP)</i>                                                                                                                                                                                                                                                                                                                                                                                                                                                                                                                                                                                                                                        | BL24788                                                                                                                            |
| <i>UAS-Khc-849-GFP</i>                                                                                                                                                                                                                                                                                                                                                                                                                                                                                                                                                                                                                                               | Palacios lab                                                                                                                       |
| <b>MARCM clones</b>                                                                                                                                                                                                                                                                                                                                                                                                                                                                                                                                                                                                                                                  |                                                                                                                                    |
| <i>OK371Gal4, FRT42D elavGal80</i>                                                                                                                                                                                                                                                                                                                                                                                                                                                                                                                                                                                                                                   | Gift from Sean Sweeney, York                                                                                                       |
| <i>HsFLP<sub>122</sub>; OK371Gal4, FRT42D elavGal80/FRT42D; UAS-Myr-RFP/+ HsFLP<sub>122</sub>; OK371Gal4, FRT42D elavGal80 /FRT42D Khc<sup>27</sup>; UAS-Myr-RFP/+ HsFLP<sub>122</sub>; OK371Gal4, FRT42D elavGal80/FRT42D Khc<sup>27</sup>; UAS-kin-1/UAS-Myr-RFP HsFLP<sub>122</sub>; OK371Gal4, FRT42D elavGal80/FRT42D imac<sup>170</sup>; UAS-Myr-RFP/+ HsFLP<sub>122</sub>; OK371Gal4, FRT42D elavGal80/FRT42D imac<sup>170</sup>; UAS-kin-3/UAS-Myr-RFP HsFLP<sub>122</sub>; OK371Gal4, FRT42D elavGal80/FRT42D imac<sup>170</sup>; UAS-kin-1/UAS-Myr-RFP HsFLP<sub>122</sub>; OK371Gal4, FRT42D elavGal80/FRT42D Khc<sup>27</sup>; UAS-kin-3/UAS-Myr-RFP</i> | BL26160, BL2118, BL7118, BL67409, BL24788<br>Palacios lab<br>Mahr and Aberle, 2006; Pack-Chung et al., 2007; Williams et al., 2014 |
| <b>Mitochondrial transport</b>                                                                                                                                                                                                                                                                                                                                                                                                                                                                                                                                                                                                                                       |                                                                                                                                    |
| <i>w; CCAP-Gal4/+; UAS-mitoGFP;/ P (UAS-lacZ.B) Bg4-2-4b and w; CCAP-Gal4/Aβ<sub>42Arc</sub>; UAS-mitoGFP/+</i>                                                                                                                                                                                                                                                                                                                                                                                                                                                                                                                                                      | BL25685, BL1777, Park et al., 2003 and Pilling et al., 2006                                                                        |
|                                                                                                                                                                                                                                                                                                                                                                                                                                                                                                                                                                                                                                                                      |                                                                                                                                    |

### **Induction of MARCM clones, live imaging, and analysis of neuronal survival**

All the flies used for the MARCM experiments were maintained at 25°C in normal fly food vials containing agar, cornmeal, molasses and yeast. Flies of the desired genotype were allowed to lay their eggs on yeast spread apple juice plates over the course of five-hour intervals. Plates were heat-shocked for 30 minutes in a 37°C water bath directly after collection. This protocol maximises clonal induction in neurons, while avoiding clonal induction in muscles. After 24 hours, the hatched L1 larvae were collected from the plate and aged for 24 more hours to reach L2. The larvae with the right genotype were selected based on markers and fluorescence<sup>82</sup>. Larvae with clones in the MNs (expression was driven by OK371-Gal4) were selected by the presence of myr-RFP (the myristoyl group targets proteins to membranes) in the neurons. FRT control, *kin1* or *kin3* mutants were analysed in parallel. Plates with eggs were kept in a humidified box to prevent drying. A few hours before imaging, we allowed the larvae to crawl on the apple juice plate to get rid of the yeast from the gut and the body (to prevent auto-fluorescence). For imaging, one larva per slide (L2 and L3) was mounted with 1x PBS. The cover slip was pressed gently to avoid killing the larvae and to prevent excessive movement. After imaging the L2 larvae, we put the larvae back on to the apple

juice plate, so they grew until the L3 stage. The expression pattern of clones in the L2 and L3 larvae were recorded using a Zeiss Axiophot (Axioskop-40) widefield fluorescence microscope fitted with an AxioCam MR operated by the AxioVision software (Zeiss). Images were processed using ImageJ (NIH) and Photoshop (Adobe) softwares. For statistics, we used One-Way ANOVA with multiple comparison tests between the genotypes and these tests were done using Prism 7 (GraphPad).

### ***Generation of iPSC-derived cortical neurons***

Human iPSCs were differentiated into cortical neurons as previously described<sup>32</sup>. Briefly, iPSCs were plated on Geltrex (Thermo Fisher Scientific)-coated plates to reach full confluence. One day after seeding (Day 0), neural induction was initiated by changing the culture medium to a 1:1 mixture of DMEM/N-2 (DMEM/F-12 + GlutaMAX (Life Technologies, cat# 31331-028); 1X N-2 (Life Technologies, cat# 17502-048); 5  $\mu\text{g mL}^{-1}$  insulin; 1 mM L-glutamine; 100  $\mu\text{M}$  non-essential amino acids; 100  $\mu\text{M}$   $\beta$ -mercaptoethanol; 50 U  $\text{mL}^{-1}$  penicillin and 50 mg  $\text{mL}^{-1}$  streptomycin) and Neurobasal/B-27 (Neurobasal (Life Technologies, cat# 12348-017); 1X B-27 (Life Technologies, cat# 17504-044); 200 mM L-glutamine; 50 U  $\text{mL}^{-1}$  penicillin and 50 mg  $\text{mL}^{-1}$  streptomycin) media (hereafter referred as N2B27) supplemented with 1  $\mu\text{M}$  dorsomorphin and 10  $\mu\text{M}$  SB431542 to inhibit TGF $\beta$  signalling and support neuronal differentiation and neurogenesis, N2B27 media was replaced every 24 hours. At day 12 the obtained neuroepithelial sheet was harvested and dissociated using the enzyme Dispase (Life Technologies, cat# 17105) and plated on laminin-coated plates. After one day, media was changed to N2B27 containing 20 ng/mL FGF2. N2B27+FGF2 was added freshly daily for 4 days to promote the maturation of neural rosettes. After 4 days FGF2 was withdrawn, and neural rosettes were maintained in N2B27 refreshing medium every other day. At day 30 neural rosettes were dissociated using Accutase (Innovative Cell Technologies, cat# AT104) and neural progenitor cells were plated on laminin-coated plates at 150,000 cells/ $\text{mm}^2$ . Plated neurons were maintained for up to 120 days with a medium change every other day.

### ***Immunohistochemistry, confocal imaging and image analysis of iPSC-derived neurons***

For confocal analysis, cells were seeded at 150,000 cells/ $\text{mm}^2$  in CellCarrier-96 Ultra Microplates (Perkin Elmer) and cultured until day 70. Immunofluorescent staining was performed as follow. Cells were washed 3 times in PBS and then fixed using 4% paraformaldehyde (v/v) in PBS for 15 minutes at RT. After 3 washes in PBS, cells were permeabilised in PBS+0.3% Triton X-100 (Sigma; Tx) for 15 minutes at room temperature (RT). After 3 washes in PBS, cells incubated for 1 h at RT in 5% BSA (Sigma) (w/v) in PBS+0.3% Triton X-100 (PBS-Tx+5% BSA). Primary antibodies were diluted in PBS-Tx+5% BSA and incubated overnight at 4°C. Cells were washed 3 times in PBS and incubated 1 hr in the dark at RT with secondary antibodies diluted 1:1000 in PBS-Tx+5% BSA. After 3 washes in PBS, samples were incubated for 5 minutes at RT with DAPI diluted 1:5000 in PBS and then washed 3 additional times with PBS. Cells were then left in 200  $\mu\text{L}$  of 1X PBS for imaging. Confocal images were obtained using an Olympus Inverted FV3000 confocal (Olympus Scientific solutions) and processed using Fiji software<sup>83</sup>. For neurites extension analysis, plates were imaged using an Opera Phenix High-Content screening system (Perkin Elmer) and images analysed using the built-in Harmony software. Antibodies against KIF1A (ab180153) and KIF5A (ab5628) were obtained from Abcam and used at 1:1000 dilution.  $\beta$ -tubulin (MMS-435P) was obtained from BioLegends and used at 1:3000 dilution.

### ***Protein extraction and western blot analysis***

Total cell protein was extracted using RIPA buffer (Sigma) supplemented with protease inhibitors (Sigma) and Halt phosphatase inhibitors (Thermo Fisher Scientific). Protein quantification was

performed using Precision Red Advanced Protein Assay buffer (Cytoskeleton, Inc.). For each sample, 30  $\mu\text{g}$  of protein were mixed with 1X NuPAGE LDS Sample Buffer (Thermo Fisher Scientific) + 1  $\mu\text{M}$  Dithiothreitol. Samples were heated at 100°C for 10 minutes and loaded on a NuPAGE 4%–12% Bis-Tris gel (Thermo Fisher Scientific). Afterward, proteins were wet transferred onto PVDF membrane (Millipore) for 1 h at 100 V. Membranes were blocked for another 60 min in 5% BSA in PBST (PBS containing 0.05% Tween 20). All primary antibodies were incubated overnight in 5% BSA in PBST at 4°C. Next day, membranes were incubated for 1 h in secondary antibody and washed gently in PBST buffer for further 30-60 min. Immunoblots were detected using LI-COR Odyssey CLx Infrared Imaging System and processed with the Image Studio Software (LI-COR).

### ***Infection of iPSC-derived neurons with MISSION shRNA or over-expression constructs***

MISSION shRNAs against human KIF1A (SHCLNG-NM\_004321) and KIF5A (SHCLNG-NM\_004984) were obtained from Sigma-Aldrich. Scramble vector was the MISSION pLKO.1-puro non-Mammalian shRNA Control vector. Lentiviral over-expression constructs were obtained as follow. cDNA of human KIF1A (MHS6278-211690363) and human KIF5A (MHA6278-202800246) were amplified from Dharmacon library (Horizon discovery) and cloned in pCR-BluntII-TOPO and pCMV-SPORT6, respectively. cDNA was then subcloned in the lentiviral vector pCSC-SP-PW-GFP (pBOB-GFP) (Addgene) for neuron infection using the NEBuilder HiFi DNA Assembly Cloning Kit (New England Biolabs). iPSC-derived neurons were infected using viral particles diluted in N2B27 media (5 MOI) for 12h. After infection, media was replaced with fresh N2B27 and changed every 48 hours.

### ***Dissection, imaging and analysis of mitochondrial axonal transport***

For mitochondrial studies we decided to use *ccap-Gal4* instead of *OK371-Gal4* because the *ccap-Gal4* driver is expressed only in a few neuronal cells, which secrete the *ccap* (crustacean cardioactive peptide) neuropeptide<sup>84</sup>. These neurons send out only one axon per segmental nerve. Therefore, we could do precise imaging of mitochondrial transport in single axons of the segmental nerves. To image L3 larvae, we washed them in fresh dissection solution (128 mM NaCl, 1 mM EGTA, 4 mM  $\text{MgCl}_2$ , 2 mM KCl, 5 mM HEPES and 36 mM sucrose, pH 7.2.)<sup>85</sup>, opened them and immobilised them for imaging. Imaging of larval axons was performed as described in<sup>86</sup> and<sup>87</sup>, and in summary: wandering third instar larvae were pinned at each end with dorsal side up to a reusable Sylgard (Sigma 761028) coated slide using pins (Fine Science Tools FST26002-10) cut to ~5 mm and bent at 90°. The larvae were cut along the dorsal midline using micro-dissection scissors. Internal organs were removed with forceps without disturbing the ventral ganglion and MNs. Larvae were then covered in dissection solution. The cuticle was then pulled back with four additional pins. The anterior pin was adjusted to ensure axons are taut and as flat as possible for optimal image quality.

Movies were taken using a Nikon E800 microscope with a 60x water immersion lens (NA 1.0 Nikon Fluor WD 2.0) and an LED light source driven by Micromanager 1.4.22 Freeware<sup>88</sup>. A CMOS camera (01-OPTIMOS-F-M-16-C) was used to record 100 frames at a rate of 1 frame per 5 s (8.3 min total). Axons were imaged within 200  $\mu\text{m}$  of the ventral ganglion in the proximal portion of the axons and no longer than 30 min after dissection. A minimum of 23 movies was taken for each genotype and roughly 2-3 axons imaged per larvae. Movies were converted into kymographs using Fiji<sup>83</sup>, and mitochondrial motility was quantified manually with the experimenter blinded to the condition. In each movie (filmed at 10 frames per second), regions of interest (120 x 10  $\mu\text{m}$ , based on the length of axon in focus suitable for a movie in most dissections) were analysed from the proximity of the VNC to the distal region of the axon at each time point. The number of each fraction of mitochondria (stationary, anterograde and retrograde) was quantified and percentage of

each fraction of mitochondria was calculated for each movie. Unpaired student 't' test was used to determine the significance between different genotypes.

### ***Calculation of average number of mitochondria and average velocity of mitochondria***

Average numbers of mitochondria in the axons of the control and the  $A\beta_{42Arc}$  were calculated manually using the same movies which were used to generate the kymograph using ImageJ with the same ROI. Unpaired student 't' test was used to determine the significance between different genotypes. The average velocity was calculated by determining the speed of each mitochondrion from the kymograph generated. For each mitochondrion, we calculated the first velocity until it made an obvious shift, by drawing a straight line on ImageJ (change of direction or pause represent different straight lines on a kymograph). Then the second velocity was calculated until the next drift and the process continued until it finished anteriorly or posteriorly. After calculating the velocity for each shift for each mitochondrion in a series of images, we calculated the average mean velocity for each mitochondrion and finally calculated the average velocity of both anterograde and retrograde separately. The velocity was calculated using the 'Velocity Measurement Tool' on ImageJ ([http://dev.mri.cnrs.fr/projects/imagejmacros/wiki/Velocity\\_Measurement\\_Tool](http://dev.mri.cnrs.fr/projects/imagejmacros/wiki/Velocity_Measurement_Tool)).

### ***Egg collection, larval staging and analysis of boutons and cargoes in NMJ of the 3<sup>rd</sup> instar larvae***

Males and females of the desired genotype flies were put in a cage with yeast plated apple juice plate and kept at 29°C. The flies were allowed to lay eggs on fresh apple juice plate every day for the next two days and these plates were discarded. On the third day the flies were transferred on to a fresh apple juice plate for the collection and selection of the late 3<sup>rd</sup> instar larvae. Although the 3<sup>rd</sup> instar can be distinguished based on the number of teeth in their mouthparts, precise staging is difficult because of the asynchronization of the development of the larvae. Wandering larvae for fillet making were staged by feeding them with thick yeast paste mixed with bromophenol blue sodium salt (sigma, B5525). The wandering larvae stop feeding and the blue dye gradually disappears from their intestine completely. Larvae with blue or white gut were considered to be early L3 (12-24 hours before pupariation) or late L3 (1-6 hours before pupariation), respectively<sup>89,90</sup>. We mainly selected larvae with partially cleared gut and fully cleared gut for bouton number analysis, as the new synaptic boutons are continually added until the late 3<sup>rd</sup> instar larval stage. Larvae were placed in saline solution, pinned dorsal side up and dissected from posterior to anterior to obtain fillet preparation. The body was extended and pinned on both side; the gut was carefully removed, and fillet were washed with saline solution. Larvae were fixed (4% formaldehyde), transferred into a solution of PBS-Triton (0.3%) and immune-stained using the set of primary and secondary antibodies indicated in the table above. Samples were transferred in glycerol and imaged using Leica TCS SP5 upright confocal microscope; images were processed using ImageJ (NIH) and Photoshop (Adobe). All the images were acquired from the muscle 6/7 of abdominal segment A3 of the larval fillet and we manually counted the total number of boutons, synaptic puncta and Bruchpilot puncta. We used one-way ANOVA statistical tests for multiple comparison and unpaired student 't' test for the comparison between two genotypes; these tests were done using Prism 7 (GraphPad).

### ***Negative geotaxis climbing assay***

Stocks used for these experiments were isogenised by backcrossing them six times with w1118 flies. To assay the climbing ability of the control,  $A\beta_{42-arcitic}$  and rescue flies, 15 female flies of the

same age were collected for each genotype and placed in different 25ml plastic pipettes. We left the flies in the pipettes for at least five hours prior to the experiment, for them to acclimatize to the pipette and get rid of the CO<sub>2</sub> effect<sup>91</sup>. Experiments were performed at a room temperature of 25°C. In each experiment, the flies were tapped down to the bottom of the plastic pipette and allowed to climb for one minute. The numbers of flies crossing the 15ml line (i.e. at around 3.8 cm from the bottom) and of those remaining at the bottom of the pipette were recorded. The assays were repeated three times with 15 flies for each genotype and for different ages. The graph in Figure 6 represents average of the results from the three independent trials and expressed as the average percentage of the total number of flies in the tube (= % of climbing activity). Statistical significance was assessed between genotypes over time by unpaired student's t test (comparison made between two genotypes) using GraphPad Prism 7.

### Figure legends

**Figure 1. kinesin-1 and kinesin-3 are required for survival of neuronal clones in *Drosophila* larvae.** (A) Analysis of MARCM-induced clones of *Drosophila* larvae at the 2<sup>nd</sup> (L2 (~L1+24h)) and 3<sup>rd</sup> instar (L3) (~L2+48h) in the same individual, where clones (red arrows) in the motor neurons (driven by the OK371-Gal4 driver line) are marked with myristoylated-RFP, which labels all the membranes of the cell body, axons and dendrites. The larvae are oriented with the anterior region towards the left and the posterior region towards the right. The anterior region of each larva can be distinguished by the presence of two bright salivary glands (green arrows); the CNS is located in between the two salivary glands. Representative images are shown from FRT42D control (left), *kin1* mutant clones (middle), and *kin3* mutant clones (right) in the region of the salivary glands. Note that in the control, both L2 and L3 (of the same individual) show several clones that are visible as marked with RFP (red arrows). However, analysis at L3 of *kin1* mutant and of *kin3* mutant larvae shows loss of clones that were present at L2 (red arrows). Scale bar, 100µm and 300µm for L2 and L3, respectively. (B) Histogram showing the average percentage of animals displaying MARCM-induced clones from L2 to L3 (same animals) in control (n=27), *kin1* (n=23) and *kin3* (n=22) mutant larvae, as well as in larvae carrying the *kin1* mutation in conjunction with Kin1 (n=20) or Kin3 (n=13) overexpression, and in larvae carrying the *kin3* mutation in conjunction with Kin1 (n=24) or Kin3 overexpression (n=19). *kin1* and *kin3* mutant larvae show a significant loss of neuronal clones from L2 to L3, in comparison with the other genotypes analysed. Error bars represents ± SEM. \* indicates p<0.01.

**Figure 2. Silencing of KIF1A and KIF5A in iPSC-derived neurons.** (A) iPSC-derived neurons were cultured for 100 days and then labelled using DAPI (blue), and antibodies against KIF1A (upper row; green) or KIF5A (bottom row; green) and β3-tubulin (labels axons and dendrites; red). Both motors are detected in cell body (long arrow) and neurites (short arrow), revealing a speckled pattern. Scale bars, 20µm. (B) iPSC-derived neurons were infected with scramble shRNA (control) or shRNA against KIF1A and KIF5A (see materials and methods). Western blots show the reduction in KIF1A and KIF5A proteins after shRNA infection. The untargeted β3-tubulin was not affected. (C) iPSC-derived neurons were infected at day 30 with both shRNA constructs against KIF1A and KIF5A and cultured to day 65 when cells were fixed and stained for DAPI (blue) and β3-tubulin (green). The composite images capture cell distribution in the entire imaging well of a 96 well plate. It is possible to notice a reduction of both cell growth and neurites extension in neurons with shRNAs against KIF1A and KIF5A, compared with the control (scramble shRNA). (D) Cell growth was analysed through the Harmony software using DAPI area as a marker of cell distribution. We observe an increase of the area between DAPI clumps and a reduction of clump



area in neurons infected with shRNA against KIF1A and KIF5A (n=6); Student's t test (\* indicates  $p < 0.05$ ). Lines show means and SEM.

**Figure 3.  $A\beta_{42Arc}$  expression affects axonal transport of mitochondria.** (A) Representative kymograph showing mitochondrial transport in control (top) and  $A\beta_{42Arc}$ -expressing (bottom) motor axons in L3 larvae during 500s time-series. GFP-labelled mitochondria were observed in motor neurons using *CCAP-Gal4*, *UAS-Mito-GFP* larvae. Three different categories of mitochondria were scored, i.e. stationary, anterograde, and retrograde (the direction of movement is indicated at the top). Kymographs show a significant increase in the stationary status of mitochondria, as well as a decrease in the anterograde and retrograde fractions of mitochondria, in larvae where motor neurons express human  $A\beta_{42Arc}$  compared with the control. scale bar, 10  $\mu\text{m}$ . (B) Histogram showing quantification of the total number of mitochondria. (C) Histogram showing quantification of the percentage of stationary, retrograde or anterograde mitochondria populations in motor neurons from controls (n=24) and from larvae with  $A\beta_{42Arc}$ -expressing motor neurons (n=23). No overall difference was observed in the total number of mitochondria between the two conditions. However, the percentage of stationary mitochondria was significantly higher, and the fraction of mitochondria in anterograde and retrograde movement was significantly lower, in  $A\beta_{42Arc}$ -expressing motor neurons compared with the control. \* indicates  $p < 0.05$ . Lines show mean  $\pm$  SEM.

**Figure 4. Synaptic morphology and synaptic bouton quantification in control neurons and in neurons with  $A\beta_{42Arc}$  with or without kinesin overexpression.** (A) Confocal images of the NMJ at muscles 6/7 (segment A3, L3 larval stage) in controls,  $A\beta_{42Arc}$ -expressing larvae, and in larvae co-expressing both  $A\beta_{42Arc}$  and either Kin1 or Kin3, stained with phalloidin (muscle staining, top row and in blue in the bottom row), and with the presynaptic neuronal membrane marker anti-HRP (middle row, and in red in the bottom row). The large and small arrows indicate Type 1b and Type 1s boutons, respectively. Scale bar, 10  $\mu\text{m}$ . (B) Histograms showing the total number of boutons in the same genetic background as described in (A). Lines represent mean  $\pm$  SEM, \* indicates  $p < 0.05$ .

**Figure 5. Quantification of 1b and 1s boutons in control and  $A\beta_{42Arc}$  expressing neurons.** Histograms showing (left) the total number of 1b boutons and (right) the total number of 1s boutons, as quantified at NMJ 6/7 (segment A3, L3 larval stage) in controls (n=21) and in  $A\beta_{42Arc}$ -expressing larvae (n=43). Lines represent mean  $\pm$  SEM, \* indicates  $p < 0.05$ .

**Figure 6. Over-expression of Kinesin-1 or Kinesin-3 rescues climbing performance of  $A\beta_{42Arc}$  *Drosophila*.** Graphical profile showing the climbing performance of the flies carrying the following genotypes over a period of 0-25 days post-eclosion: Control (*elavGal4*),  $A\beta_{Arc}$  (*elavGal4; UAS-A\beta\_{42Arc}*),  $A\beta_{Arc}$  + GFP (*elavGal4; UAS-A\beta\_{42Arc}; UAS-GFP*),  $A\beta_{Arc}$  + Kin1 (*elavGal4; UAS-A\beta\_{42Arc}; UAS-Kin1*),  $A\beta_{Arc}$  + Kin3 (*elavGal4; UAS-A\beta\_{42Arc}; UAS-Kin3*),  $A\beta_{Arc}$  + Kin1(1-849) (*elavGal4; UAS-A\beta\_{42Arc}; UAS-Khc-849*). The X-axis shows the age of the flies (in number of days post-eclosion) and the Y-axis shows the average percentage of flies that climbed over the threshold line (see materials and methods). Climbing performance was measured from day 5 in all flies. p-values are presented in comparison with the values obtained for the overexpression of  $A\beta_{42Arc}$  and are as follows:

At 15-days of age:  $A\beta_{42Arc}$  vs control and  $A\beta_{42Arc}$  vs  $A\beta_{42Arc}$  + Kin-1 \*\*\*,  $A\beta_{42Arc}$  vs  $A\beta_{42Arc}$  + Kin-3 \*\*,  $A\beta_{42Arc}$  vs  $A\beta_{42Arc}$  + Kin1(1-849) \*,  $A\beta_{42Arc}$  vs  $A\beta_{42Arc}$  + GFP n.s.

At 25 days of age:  $A\beta_{42Arc}$  vs control \*,  $A\beta_{42Arc}$  vs  $A\beta_{42Arc}$  + Kin-1 \*\*\*\*,  $A\beta_{42Arc}$  vs  $A\beta_{42Arc}$  + Kin-3 \*\*,  $A\beta_{42Arc}$  vs  $A\beta_{42Arc}$  + GFP and  $A\beta_{42Arc}$  vs  $A\beta_{42Arc}$  + Kin1(1-849) n.s. Four experimental repeats per genotype with 15 flies per trial. \*, \*\*, \*\*\* and \*\*\*\* indicate  $p < 0.05$ ,  $< 0.01$ ,  $< 0.001$  and  $< 0.0001$  respectively. The error bar represents SEM.

**Supplementary figure S1. Images showing the labelling of neurons by the MARCM technique from a 3<sup>rd</sup> instar larval fillet.** Left: Central region of the ventral nerve cord in which some motor neurons are labelled thanks to the MARCM technique using the driver line OK371-Gal4 and the UASmyr-RFP effector. Anterior to the left. Scale 50  $\mu\text{m}$ . Right: Enlarged view of motor neurons labelled with OK371Gal4 and UASmyr-RFP, with at the (top) a view of the axons, in the (middle) a view of the axons where they join the muscle fibre and form boutons at the neuromuscular junctions (NMJ 6/7), and at the (bottom) a view of the neuronal dendrites. Anterior to the top. Scale bar, 10 $\mu\text{m}$ .

**Supplementary figure S2. Immunostaining and cell number after silencing both KIF1A and KIF5A in iPSC-derived neurons.** (A) iPSC-derived neurons were infected at day 30 with both shRNA constructs against KIF1A and KIF5A and cultured to day 65 when cells were fixed and stained for DAPI (blue) and  $\beta$ 3-tubulin (red). (B) A comparison of the number of cells present in areas between neuronal clumps in control neuronal cultures (n=4 areas of 0.150mm<sup>2</sup>) and in neuronal cultures infected by KIF1A<sup>sh</sup>:KIF5A<sup>sh</sup> (n=3 areas of 0.150mm<sup>2</sup>) ( $p=0.0020$ , t-test).

**Supplementary figure S3. Immunostaining and cell number after silencing either KIF1A or KIF5A in iPSC-derived neurons.** (A) iPSC-derived neurons were infected at day 30 with either shRNA constructs against KIF1A or KIF5A and cultured to day 65 when cells were fixed and stained for DAPI (blue) and  $\beta$ 3-tubulin (red), as well as for either KIF1A or KIF5A (green). (B) A comparison of the number of cells present in areas between neuronal clumps in control neuronal cultures (n=3 areas of 0.150mm<sup>2</sup>) and in neuronal cultures infected by sh KIF1A (n=5 areas of 0.150mm<sup>2</sup>) or sh KIF5A (n=5 areas of 0.150mm<sup>2</sup>) (Kruskal-wallis multi-comparison test).

**Supplementary figure S4. Protein extracts and A $\beta$ 42/40 ratios after overexpressing KIF1A or KIF5A in iPSC-derived DSiPS neurons.** (A) Protein extracts after infection of iPSC-derived DSiPS neurons with Lentiviral over-expression constructs for KIF1A and KIF5A. Western blots show that KIF1A and KIF5A levels are increased, but that tau and actin levels were not affected in cells with higher amount of kinesins. (B) A $\beta$ 42/40 ratio was analysed in conditioned media from iPSC-derived neurons (control) and iPSC-derived DSiPS neurons. A decrease is detected in DSiPS neurons compared to control neurons. No effect on A $\beta$ 42/40 ratio was reported after over-expression of KIF1A or KIF5A.

**Supplementary figure S5. Quantification of the Bruchpilot puncta at the NMJ 6/7 of control and A $\beta$ <sub>42Arc</sub> larvae.** (A) Confocal images of the NMJ 6/7 (segment A3, L3 larval stage) stained with the active zone protein marker Bruchpilot (Brp, green in the bottom row) and with the presynaptic neuronal membrane marker anti-HRP (HRP, red in the bottom row). F-actin in muscles is labelled with phalloidin (Top panel and blue in the bottom row). Scale bar, 10  $\mu\text{m}$ . (B) Quantification of the Bruchpilot puncta present in the larval NMJ6/7 in control (n=18) and in A $\beta$ <sub>42Arc</sub> (n=14) larvae. No difference can be observed in the number of puncta between these two types of larvae.

### Acknowledgements

We thank Sean T. Sweeney and Damian Crowther for reagents; Matthias Landgraf, Charalampos Rallis and Teresa Niccoli for manuscript comments and discussions. Matthew Oswald and Matthias Landgraf for stocks, immense help with the *Drosophila* work and for discussions.

### Competing interests

The authors declare no competing financial interests.

### References

- 1 Selkoe, D. J. & Hardy, J. The amyloid hypothesis of Alzheimer's disease at 25 years. *EMBO Mol Med* **8**, 595-608, doi:10.15252/emmm.201606210 (2016).
- 2 Lane, C. A., Hardy, J. & Schott, J. M. Alzheimer's disease. *Eur J Neurol* **25**, 59-70, doi:10.1111/ene.13439 (2018).
- 3 Zempel, H. *et al.* Amyloid-beta oligomers induce synaptic damage via Tau-dependent microtubule severing by TTLL6 and spastin. *EMBO J* **32**, 2920-2937, doi:10.1038/emboj.2013.207 (2013).
- 4 Zempel, H. & Mandelkow, E. M. Tau missorting and spastin-induced microtubule disruption in neurodegeneration: Alzheimer Disease and Hereditary Spastic Paraplegia. *Mol Neurodegener* **10**, 68, doi:10.1186/s13024-015-0064-1 (2015).
- 5 Brady, S. T. & Morfini, G. A. Regulation of motor proteins, axonal transport deficits and adult-onset neurodegenerative diseases. *Neurobiol Dis* **105**, 273-282, doi:10.1016/j.nbd.2017.04.010 (2017).
- 6 Hiruma, H., Katakura, T., Takahashi, S., Ichikawa, T. & Kawakami, T. Glutamate and amyloid beta-protein rapidly inhibit fast axonal transport in cultured rat hippocampal neurons by different mechanisms. *J Neurosci* **23**, 8967-8977 (2003).
- 7 Decker, H., Lo, K. Y., Unger, S. M., Ferreira, S. T. & Silverman, M. A. Amyloid-beta peptide oligomers disrupt axonal transport through an NMDA receptor-dependent mechanism that is mediated by glycogen synthase kinase 3beta in primary cultured hippocampal neurons. *J Neurosci* **30**, 9166-9171, doi:10.1523/JNEUROSCI.1074-10.2010 (2010).
- 8 Tang, Y. *et al.* Early and selective impairments in axonal transport kinetics of synaptic cargoes induced by soluble amyloid beta-protein oligomers. *Traffic* **13**, 681-693, doi:10.1111/j.1600-0854.2012.01340.x (2012).
- 9 Crowther, D. C. *et al.* Intraneuronal Abeta, non-amyloid aggregates and neurodegeneration in a Drosophila model of Alzheimer's disease. *Neuroscience* **132**, 123-135, doi:10.1016/j.neuroscience.2004.12.025 (2005).
- 10 Finelli, A., Kelkar, A., Song, H. J., Yang, H. & Konsolaki, M. A model for studying Alzheimer's Abeta42-induced toxicity in Drosophila melanogaster. *Mol Cell Neurosci* **26**, 365-375, doi:10.1016/j.mcn.2004.03.001 (2004).
- 11 Iijima, K. *et al.* Dissecting the pathological effects of human Abeta40 and Abeta42 in Drosophila: a potential model for Alzheimer's disease. *Proc Natl Acad Sci U S A* **101**, 6623-6628, doi:10.1073/pnas.0400895101 (2004).
- 12 Crowther, D. C., Kinghorn, K. J., Page, R. & Lomas, D. A. Therapeutic targets from a Drosophila model of Alzheimer's disease. *Curr Opin Pharmacol* **4**, 513-516, doi:10.1016/j.coph.2004.07.001 (2004).
- 13 Greeve, I. *et al.* Age-dependent neurodegeneration and Alzheimer-amyloid plaque formation in transgenic Drosophila. *J Neurosci* **24**, 3899-3906, doi:10.1523/JNEUROSCI.0283-04.2004 (2004).
- 14 Zhao, X. L. *et al.* Expression of beta-amyloid induced age-dependent presynaptic and axonal changes in Drosophila. *J Neurosci* **30**, 1512-1522, doi:10.1523/JNEUROSCI.3699-09.2010 (2010).
- 15 Nilsberth, C. *et al.* The 'Arctic' APP mutation (E693G) causes Alzheimer's disease by enhanced Abeta protofibril formation. *Nat Neurosci* **4**, 887-893, doi:10.1038/nn0901-887 (2001).
- 16 Sofola, O. *et al.* Inhibition of GSK-3 ameliorates Abeta pathology in an adult-onset Drosophila model of Alzheimer's disease. *PLoS Genet* **6**, e1001087, doi:10.1371/journal.pgen.1001087 (2010).
- 17 Pigino, G. *et al.* Disruption of fast axonal transport is a pathogenic mechanism for intraneuronal amyloid beta. *Proc Natl Acad Sci U S A* **106**, 5907-5912, doi:10.1073/pnas.0901229106 (2009).
- 18 Kaether, C., Skehel, P. & Dotti, C. G. Axonal membrane proteins are transported in distinct carriers: a two-color video microscopy study in cultured hippocampal neurons. *Mol Biol Cell* **11**, 1213-1224, doi:10.1091/mbc.11.4.1213 (2000).
- 19 Guo, W., Stoklund Dittlau, K. & Van Den Bosch, L. Axonal transport defects and neurodegeneration: Molecular mechanisms and therapeutic implications. *Semin Cell Dev Biol* **99**, 133-150, doi:10.1016/j.semcdb.2019.07.010 (2020).
- 20 Prokop, A. A common theme for axonopathies? The dependency cycle of local axon homeostasis. *Cytoskeleton (Hoboken)* **78**, 52-63, doi:10.1002/cm.21657 (2021).
- 21 Wang, Q., Tian, J., Chen, H., Du, H. & Guo, L. Amyloid beta-mediated KIF5A deficiency disrupts anterograde axonal mitochondrial movement. *Neurobiol Dis* **127**, 410-418, doi:10.1016/j.nbd.2019.03.021 (2019).
- 22 Kamal, A., Stokin, G. B., Yang, Z., Xia, C. H. & Goldstein, L. S. Axonal transport of amyloid precursor protein is mediated by direct binding to the kinesin light chain subunit of kinesin-I. *Neuron* **28**, 449-459. (2000).
- 23 Vagnoni, A. *et al.* Calsyntenin-1 mediates axonal transport of the amyloid precursor protein and regulates Abeta production. *Hum Mol Genet* **21**, 2845-2854, doi:10.1093/hmg/dds109 (2012).
- 24 Fu, M. M. & Holzbaur, E. L. JIP1 regulates the directionality of APP axonal transport by coordinating kinesin and dynein motors. *J Cell Biol* **202**, 495-508, doi:10.1083/jcb.201302078 (2013).

- 25 Bellen, H. J., Tong, C. & Tsuda, H. 100 years of *Drosophila* research and its impact on vertebrate neuroscience: a history lesson for the future. *Nat Rev Neurosci* **11**, 514-522, doi:10.1038/nrn2839 (2010).
- 26 Greenspan, R. J. The origins of behavioral genetics. *Curr Biol* **18**, R192-198, doi:10.1016/j.cub.2008.01.015 (2008).
- 27 Rubin, G. M. *et al.* Comparative genomics of the eukaryotes. *Science* **287**, 2204-2215 (2000).
- 28 Pack-Chung, E., Kurshan, P. T., Dickman, D. K. & Schwarz, T. L. A *Drosophila* kinesin required for synaptic bouton formation and synaptic vesicle transport. *Nat Neurosci* **10**, 980-989, doi:10.1038/nn1936 [pii]10.1038/nn1936 (2007).
- 29 Brendza, R. P., Serbus, L. R., Duffy, J. B. & Saxton, W. M. A function for Kinesin I in the posterior transport of *oskar* mRNA and Staufen protein. *Science* **289**, 2120-2122 (2000).
- 30 Lee, T. & Luo, L. Mosaic analysis with a repressible cell marker for studies of gene function in neuronal morphogenesis. *Neuron* **22**, 451-461 (1999).
- 31 Serra-Marques, A. *et al.* Concerted action of kinesins KIF5B and KIF13B promotes efficient secretory vesicle transport to microtubule plus ends. *Elife* **9**, doi:10.7554/eLife.61302 (2020).
- 32 Shi, Y., Kirwan, P. & Livesey, F. J. Directed differentiation of human pluripotent stem cells to cerebral cortex neurons and neural networks. *Nat Protoc* **7**, 1836-1846, doi:10.1038/nprot.2012.116 (2012).
- 33 Shi, Y., Kirwan, P., Smith, J., Robinson, H. P. & Livesey, F. J. Human cerebral cortex development from pluripotent stem cells to functional excitatory synapses. *Nat Neurosci* **15**, 477-486, S471, doi:10.1038/nn.3041 (2012).
- 34 Cheon, M. S., Dierssen, M., Kim, S. H. & Lubec, G. Protein expression of BACE1, BACE2 and APP in Down syndrome brains. *Amino Acids* **35**, 339-343, doi:10.1007/s00726-007-0618-9 (2008).
- 35 Wisniewski, K. E., Dalton, A. J., McLachlan, C., Wen, G. Y. & Wisniewski, H. M. Alzheimer's disease in Down's syndrome: clinicopathologic studies. *Neurology* **35**, 957-961, doi:10.1212/wnl.35.7.957 (1985).
- 36 Cole, J. H. *et al.* Brain-predicted age in Down syndrome is associated with beta amyloid deposition and cognitive decline. *Neurobiol Aging* **56**, 41-49, doi:10.1016/j.neurobiolaging.2017.04.006 (2017).
- 37 Head, E. & Lott, I. T. Down syndrome and beta-amyloid deposition. *Curr Opin Neurol* **17**, 95-100, doi:10.1097/00019052-200404000-00003 (2004).
- 38 Hu, N. W. *et al.* Extracellular Forms of Abeta and Tau from iPSC Models of Alzheimer's Disease Disrupt Synaptic Plasticity. *Cell Rep* **23**, 1932-1938, doi:10.1016/j.celrep.2018.04.040 (2018).
- 39 Mhatre, S. D. *et al.* Synaptic abnormalities in a *Drosophila* model of Alzheimer's disease. *Dis Model Mech* **7**, 373-385, doi:10.1242/dmm.012104 (2014).
- 40 Iijima-Ando, K. *et al.* Mitochondrial mislocalization underlies Abeta42-induced neuronal dysfunction in a *Drosophila* model of Alzheimer's disease. *PLoS One* **4**, e8310, doi:10.1371/journal.pone.0008310 (2009).
- 41 Pilling, A. D., Horiuchi, D., Lively, C. M. & Saxton, W. M. Kinesin-1 and Dynein are the primary motors for fast transport of mitochondria in *Drosophila* motor axons. *Mol Biol Cell* **17**, 2057-2068 (2006).
- 42 Small, D. H., Mok, S. S. & Bornstein, J. C. Alzheimer's disease and Abeta toxicity: from top to bottom. *Nat Rev Neurosci* **2**, 595-598, doi:10.1038/35086072 (2001).
- 43 Shen, J. & Kelleher, R. J., 3rd. The presenilin hypothesis of Alzheimer's disease: evidence for a loss-of-function pathogenic mechanism. *Proc Natl Acad Sci U S A* **104**, 403-409, doi:10.1073/pnas.0608332104 (2007).
- 44 Chiang, H. C., Iijima, K., Hakker, I. & Zhong, Y. Distinctive roles of different beta-amyloid 42 aggregates in modulation of synaptic functions. *FASEB J* **23**, 1969-1977, doi:10.1096/fj.08-121152 (2009).
- 45 Bate, M. & Broadie, K. Wiring by fly: the neuromuscular system of the *Drosophila* embryo. *Neuron* **15**, 513-525, doi:10.1016/0896-6273(95)90141-8 (1995).
- 46 Karunanithi, S., Georgiou, J., Charlton, M. P. & Atwood, H. L. Imaging of calcium in *Drosophila* larval motor nerve terminals. *J Neurophysiol* **78**, 3465-3467, doi:10.1152/jn.1997.78.6.3465 (1997).
- 47 Koh, T. W., Verstreken, P. & Bellen, H. J. Dap160/intersectin acts as a stabilizing scaffold required for synaptic development and vesicle endocytosis. *Neuron* **43**, 193-205, doi:10.1016/j.neuron.2004.06.029 (2004).
- 48 Barone, M. C. & Bohmann, D. Assessing neurodegenerative phenotypes in *Drosophila* dopaminergic neurons by climbing assays and whole brain immunostaining. *J Vis Exp*, e50339, doi:10.3791/50339 (2013).
- 49 Niccoli, T. *et al.* Increased Glucose Transport into Neurons Rescues Abeta Toxicity in *Drosophila*. *Curr Biol* **26**, 2550, doi:10.1016/j.cub.2016.09.018 (2016).
- 50 Reid, E. *et al.* A kinesin heavy chain (KIF5A) mutation in hereditary spastic paraplegia (SPG10). *Am J Hum Genet* **71**, 1189-1194, doi:10.1086/344210 (2002).



- 51 Fuger, P. *et al.* Spastic paraplegia mutation N256S in the neuronal microtubule motor KIF5A disrupts axonal transport in a *Drosophila* HSP model. *PLoS Genet* **8**, e1003066, doi:10.1371/journal.pgen.1003066 (2012).
- 52 Duis, J. *et al.* KIF5A mutations cause an infantile onset phenotype including severe myoclonus with evidence of mitochondrial dysfunction. *Ann Neurol* **80**, 633-637, doi:10.1002/ana.24744 (2016).
- 53 Nam, D. E., Yoo, D. H., Choi, S. S., Choi, B. O. & Chung, K. W. Wide phenotypic spectrum in axonal Charcot-Marie-Tooth neuropathy type 2 patients with KIF5A mutations. *Genes Genomics* **40**, 77-84, doi:10.1007/s13258-017-0612-x (2018).
- 54 Nicolas, A. *et al.* Genome-wide Analyses Identify KIF5A as a Novel ALS Gene. *Neuron* **97**, 1268-1283 e1266, doi:10.1016/j.neuron.2018.02.027 (2018).
- 55 Okamoto, N. *et al.* KIF1A mutation in a patient with progressive neurodegeneration. *J Hum Genet* **59**, 639-641, doi:10.1038/jhg.2014.80 (2014).
- 56 Nicita, F. *et al.* Heterozygous KIF1A variants underlie a wide spectrum of neurodevelopmental and neurodegenerative disorders. *J Med Genet* **58**, 475-483, doi:10.1136/jmedgenet-2020-107007 (2021).
- 57 Yonekawa, Y. *et al.* Defect in synaptic vesicle precursor transport and neuronal cell death in KIF1A motor protein-deficient mice. *J Cell Biol* **141**, 431-441, doi:10.1083/jcb.141.2.431 (1998).
- 58 Tanaka, Y. *et al.* The Molecular Motor KIF1A Transports the TrkA Neurotrophin Receptor and Is Essential for Sensory Neuron Survival and Function. *Neuron* **90**, 1215-1229, doi:10.1016/j.neuron.2016.05.002 (2016).
- 59 Campbell, P. D. *et al.* Unique function of Kinesin Kif5A in localization of mitochondria in axons. *J Neurosci* **34**, 14717-14732, doi:10.1523/JNEUROSCI.2770-14.2014 (2014).
- 60 Xia, C. H. *et al.* Abnormal neurofilament transport caused by targeted disruption of neuronal kinesin heavy chain KIF5A. *J Cell Biol* **161**, 55-66, doi:10.1083/jcb.200301026 (2003).
- 61 Nakajima, K. *et al.* Molecular motor KIF5A is essential for GABA(A) receptor transport, and KIF5A deletion causes epilepsy. *Neuron* **76**, 945-961, doi:10.1016/j.neuron.2012.10.012 (2012).
- 62 Barkus, R. V., Klyachko, O., Horiuchi, D., Dickson, B. J. & Saxton, W. M. Identification of an axonal kinesin-3 motor for fast anterograde vesicle transport that facilitates retrograde transport of neuropeptides. *Mol Biol Cell* **19**, 274-283, doi:E07-03-0261 [pii] 10.1091/mbc.E07-03-0261 (2008).
- 63 Hirokawa, N. & Noda, Y. Intracellular transport and kinesin superfamily proteins, KIFs: structure, function, and dynamics. *Physiol Rev* **88**, 1089-1118, doi:10.1152/physrev.00023.2007 (2008).
- 64 Hurd, D. D. & Saxton, W. M. Kinesin mutations cause motor neuron disease phenotypes by disrupting fast axonal transport in *Drosophila*. *Genetics* **144**, 1075-1085 (1996).
- 65 Kawaguchi, K. Role of kinesin-1 in the pathogenesis of SPG10, a rare form of hereditary spastic paraplegia. *Neuroscientist* **19**, 336-344, doi:10.1177/1073858412451655 (2013).
- 66 Poirier, K. *et al.* Mutations in TUBG1, DYNC1H1, KIF5C and KIF2A cause malformations of cortical development and microcephaly. *Nat Genet* **45**, 639-647, doi:10.1038/ng.2613 (2013).
- 67 Gunawardena, S. & Goldstein, L. S. Disruption of axonal transport and neuronal viability by amyloid precursor protein mutations in *Drosophila*. *Neuron* **32**, 389-401. (2001).
- 68 Morihara, T. *et al.* Transcriptome analysis of distinct mouse strains reveals kinesin light chain-1 splicing as an amyloid-beta accumulation modifier. *Proc Natl Acad Sci U S A* **111**, 2638-2643, doi:10.1073/pnas.1307345111 (2014).
- 69 Kreft, K. L. *et al.* Abundant kif21b is associated with accelerated progression in neurodegenerative diseases. *Acta Neuropathol Commun* **2**, 144, doi:10.1186/s40478-014-0144-4 (2014).
- 70 Hares, K. *et al.* Overexpression of Kinesin Superfamily Motor Proteins in Alzheimer's Disease. *J Alzheimers Dis* **60**, 1511-1524, doi:10.3233/JAD-170094 (2017).
- 71 Lucero, E. M. *et al.* Increased KIF11/kinesin-5 expression offsets Alzheimer Abeta-mediated toxicity and cognitive dysfunction. *iScience* **25**, 105288, doi:10.1016/j.isci.2022.105288 (2022).
- 72 Serrano-Pozo, A., Frosch, M. P., Masliah, E. & Hyman, B. T. Neuropathological alterations in Alzheimer disease. *Cold Spring Harb Perspect Med* **1**, a006189, doi:10.1101/cshperspect.a006189 (2011).
- 73 Adalbert, R. & Coleman, M. P. Review: Axon pathology in age-related neurodegenerative disorders. *Neuropathol Appl Neurobiol* **39**, 90-108, doi:10.1111/j.1365-2990.2012.01308.x (2013).
- 74 Chu, Y. *et al.* Alterations in axonal transport motor proteins in sporadic and experimental Parkinson's disease. *Brain* **135**, 2058-2073, doi:10.1093/brain/aws133 (2012).
- 75 Torroja, L., Packard, M., Gorczyca, M., White, K. & Budnik, V. The *Drosophila* beta-amyloid precursor protein homolog promotes synapse differentiation at the neuromuscular junction. *J Neurosci* **19**, 7793-7803, doi:10.1523/JNEUROSCI.19-18-07793.1999 (1999).
- 76 Peng, F. *et al.* Loss of Polo ameliorates APP-induced Alzheimer's disease-like symptoms in *Drosophila*. *Sci Rep* **5**, 16816, doi:10.1038/srep16816 (2015).



- 77 Reddy, P. H. & Beal, M. F. Amyloid beta, mitochondrial dysfunction and synaptic damage: implications for cognitive decline in aging and Alzheimer's disease. *Trends Mol Med* **14**, 45-53, doi:10.1016/j.molmed.2007.12.002 (2008).
- 78 Loiseau, P., Davies, T., Williams, L. S., Mishima, M. & Palacios, I. M. Drosophila PAT1 is required for Kinesin-1 to transport cargo and to maximize its motility. *Development* **137**, 2763-2772 (2010).
- 79 Williams, L. S., Ganguly, S., Loiseau, P., Ng, B. F. & Palacios, I. M. The auto-inhibitory domain and ATP-independent microtubule-binding region of Kinesin heavy chain are major functional domains for transport in the Drosophila germline. *Development* **141**, 176-186, doi:10.1242/dev.097592 (2014).
- 80 Moua, P., Fullerton, D., Serbus, L. R., Warrior, R. & Saxton, W. M. Kinesin-1 tail autoregulation and microtubule-binding regions function in saltatory transport but not ooplasmic streaming. *Development* (2011).
- 81 Selvarasu, K. *et al.* Reduction of kinesin I heavy chain decreases tau hyperphosphorylation, aggregation, and memory impairment in Alzheimer's disease and tauopathy models. *Front Mol Biosci* **9**, 1050768, doi:10.3389/fmolb.2022.1050768 (2022).
- 82 Le, T. *et al.* A new family of Drosophila balancer chromosomes with a w- dfd-GMR yellow fluorescent protein marker. *Genetics* **174**, 2255-2257, doi:10.1534/genetics.106.063461 (2006).
- 83 Schindelin, J. *et al.* Fiji: an open-source platform for biological-image analysis. *Nat Methods* **9**, 676-682, doi:10.1038/nmeth.2019 (2012).
- 84 Park, J. H., Schroeder, A. J., Helfrich-Forster, C., Jackson, F. R. & Ewer, J. Targeted ablation of CCAP neuropeptide-containing neurons of Drosophila causes specific defects in execution and circadian timing of ecdysis behavior. *Development* **130**, 2645-2656, doi:10.1242/dev.00503 (2003).
- 85 Godena, V. K. *et al.* Increasing microtubule acetylation rescues axonal transport and locomotor deficits caused by LRRK2 Roc-COR domain mutations. *Nat Commun* **5**, 5245, doi:10.1038/ncomms6245 (2014).
- 86 Wang, X. & Schwarz, T. L. Imaging axonal transport of mitochondria. *Methods Enzymol* **457**, 319-333, doi:10.1016/S0076-6879(09)05018-6 (2009).
- 87 Hewitt, V. L. *et al.* Decreasing pdzd8-mediated mito-ER contacts improves organismal fitness and mitigates Aβ(42) toxicity. *Life Sci Alliance* **5**, doi:10.26508/lsa.202201531 (2022).
- 88 Edelstein AD, T. M., Amodaj N, Pinkard H, Vale RD and Stuurman N. Advanced methods of microscope control using µManager software. *J Biol Methods* **1**: e10 (2014).
- 89 Boulan, L., Martin, D. & Milan, M. bantam miRNA promotes systemic growth by connecting insulin signaling and ecdysone production. *Curr Biol* **23**, 473-478, doi:10.1016/j.cub.2013.01.072 (2013).
- 90 Andres, A. J., Fletcher, J. C., Karim, F. D. & Thummel, C. S. Molecular analysis of the initiation of insect metamorphosis: a comparative study of Drosophila ecdysteroid-regulated transcription. *Dev Biol* **160**, 388-404, doi:10.1006/dbio.1993.1315 (1993).
- 91 Bartholomew, N. R., Burdett, J. M., VandenBrooks, J. M., Quinlan, M. C. & Call, G. B. Impaired climbing and flight behaviour in Drosophila melanogaster following carbon dioxide anaesthesia. *Sci Rep* **5**, 15298, doi:10.1038/srep15298 (2015).

# Figure 1, Francis et al.

bioRxiv preprint doi: <https://doi.org/10.1101/2024.04.23.590704>; this version posted April 23, 2024. The copyright holder for this preprint (which was not certified by peer review) is the author/funder. All rights reserved. No reuse allowed without permission.

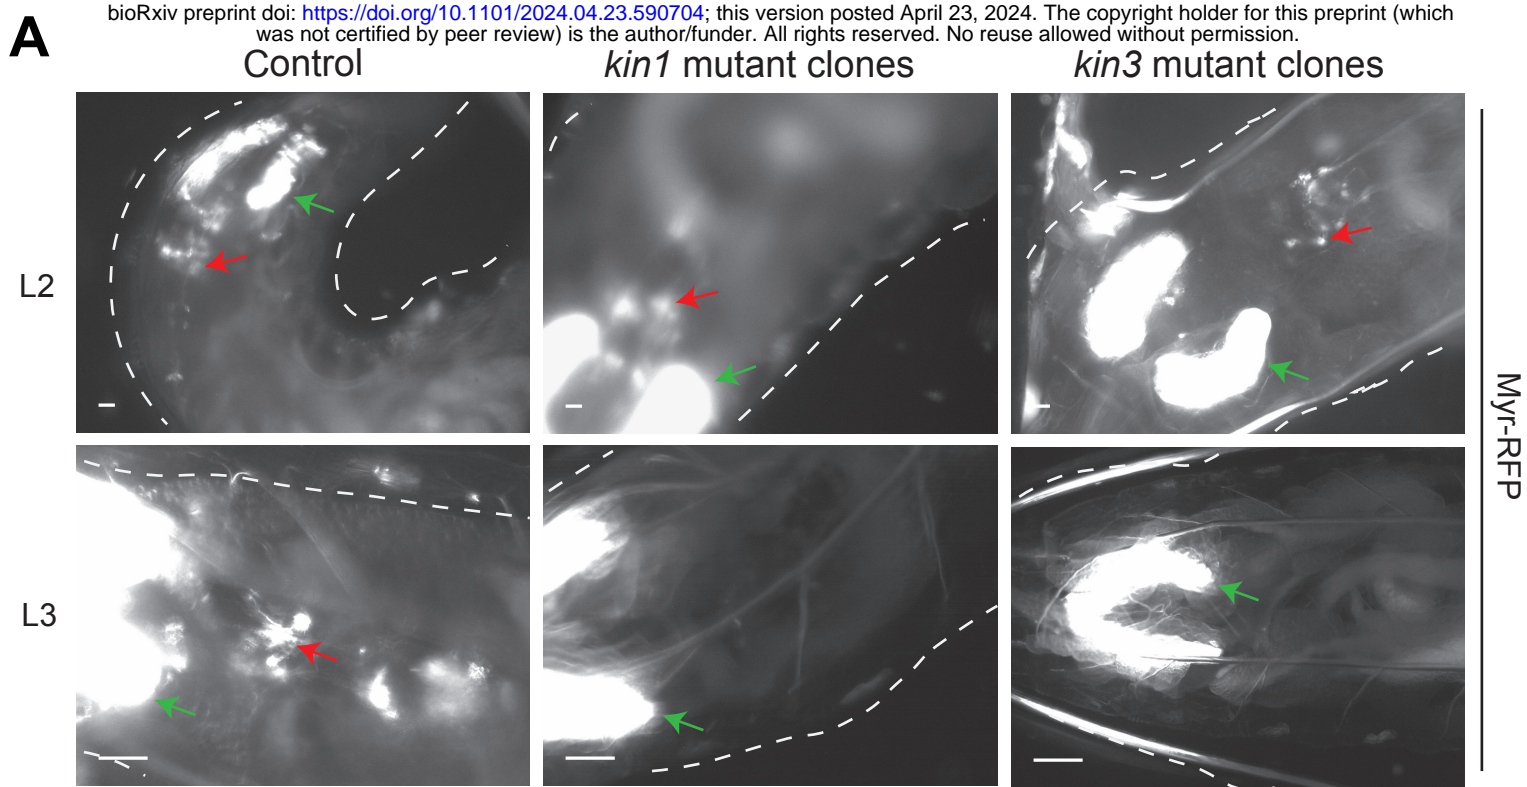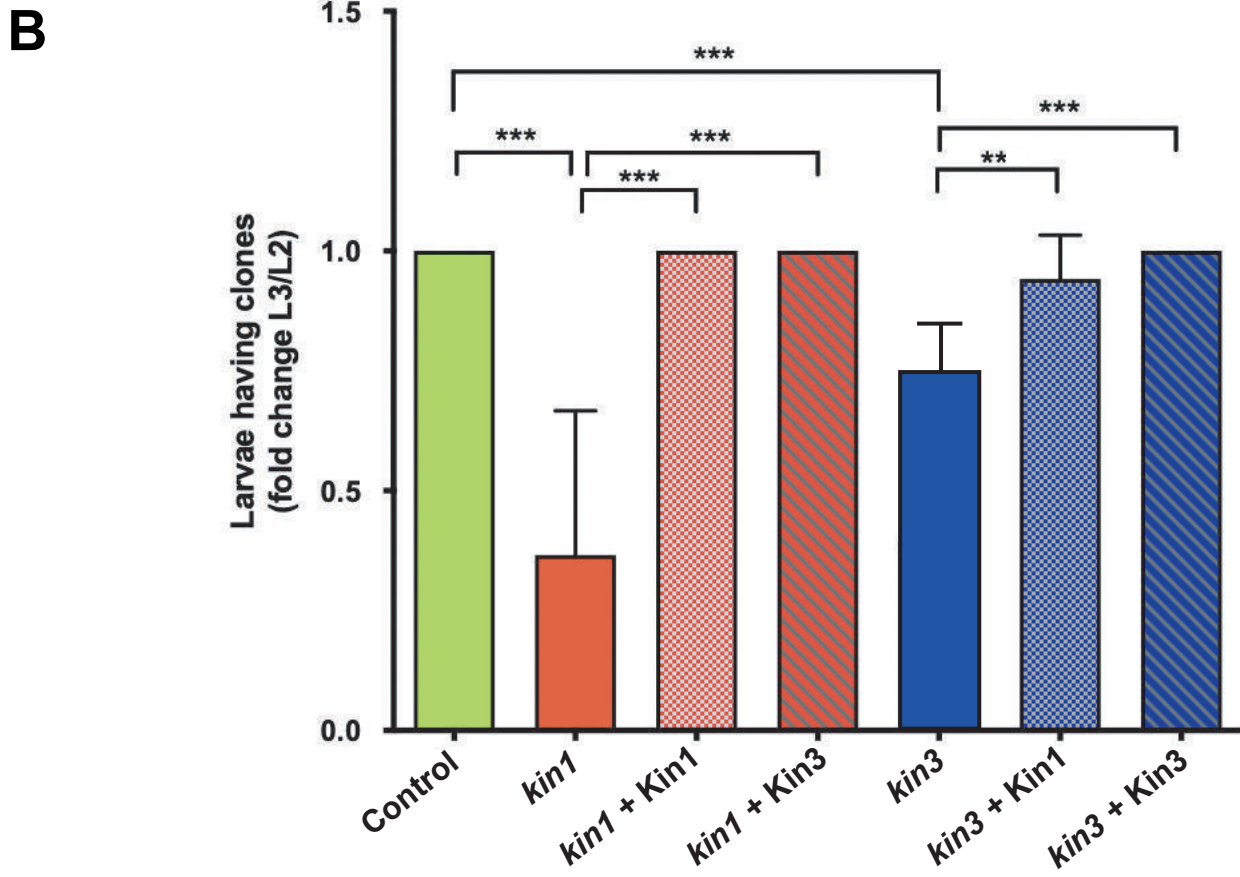



Figure 2, Francis et al.

**A**

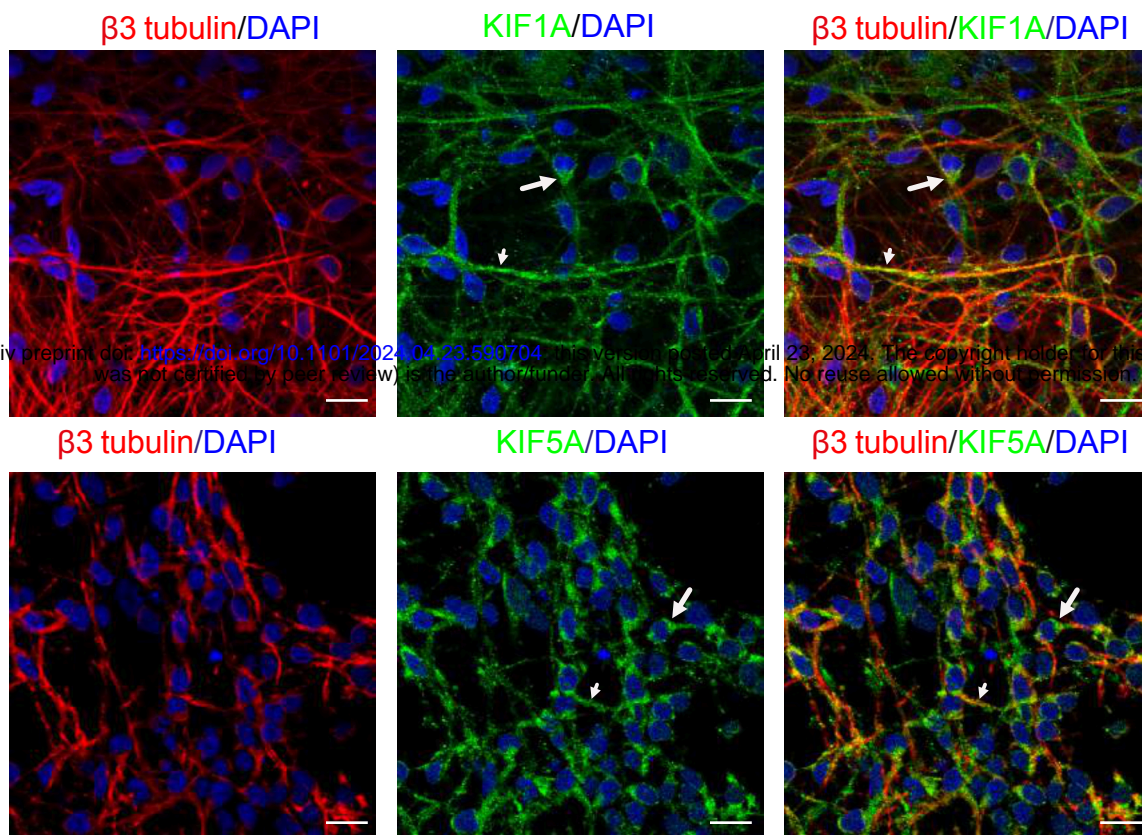

**B**

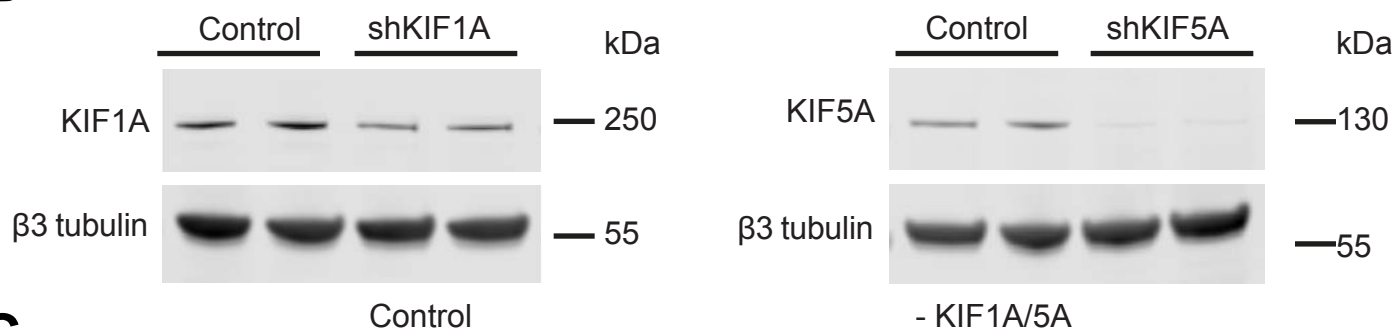

**C**

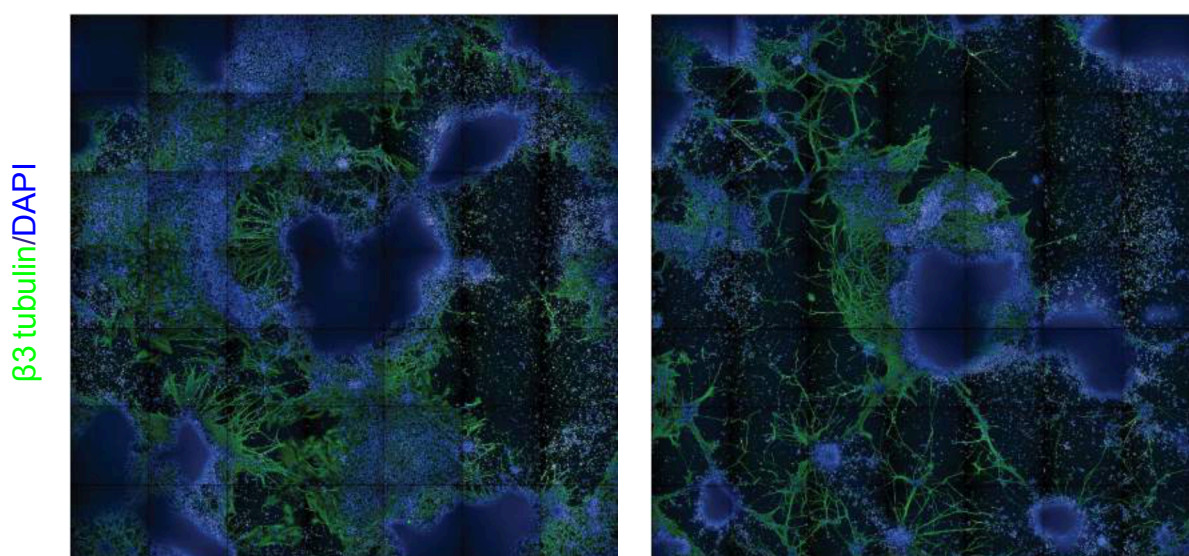

**D**

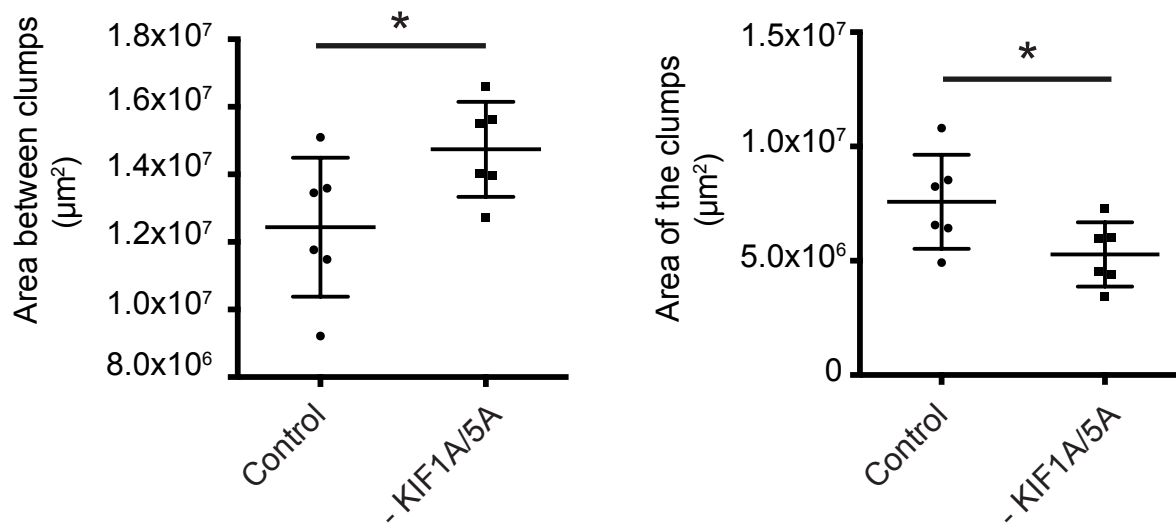

**Figure 3, Francis et al.**

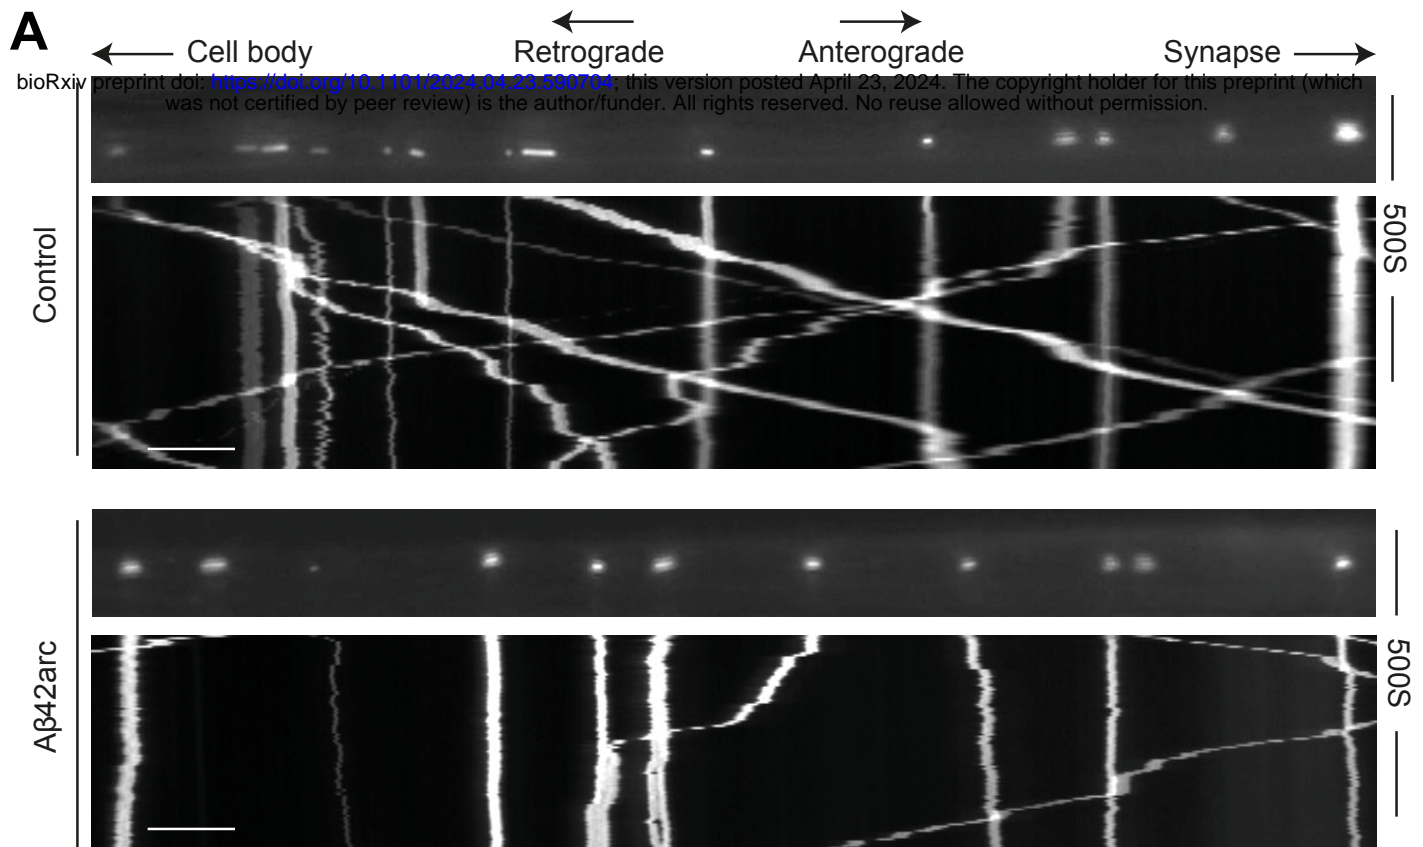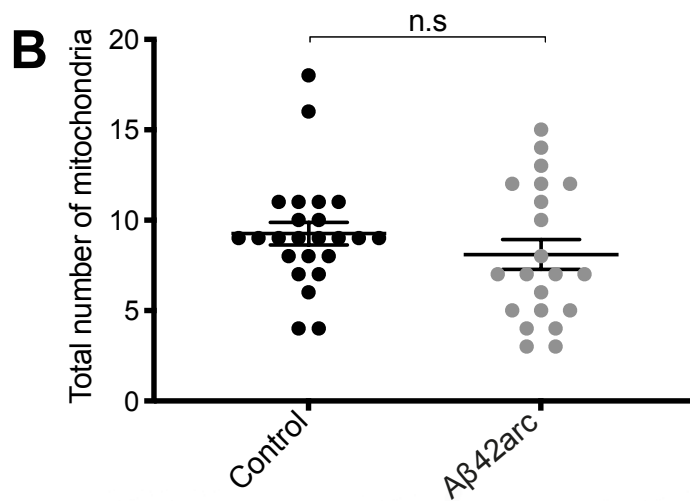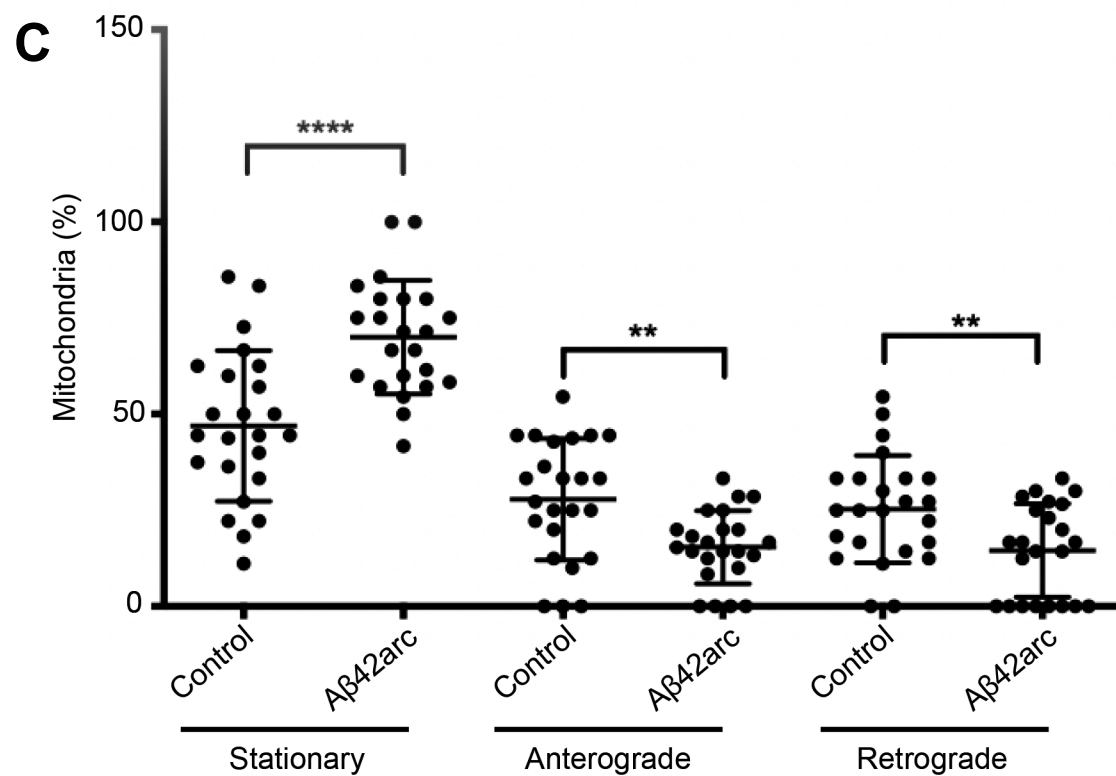



**Figure 4, Francis et al.**

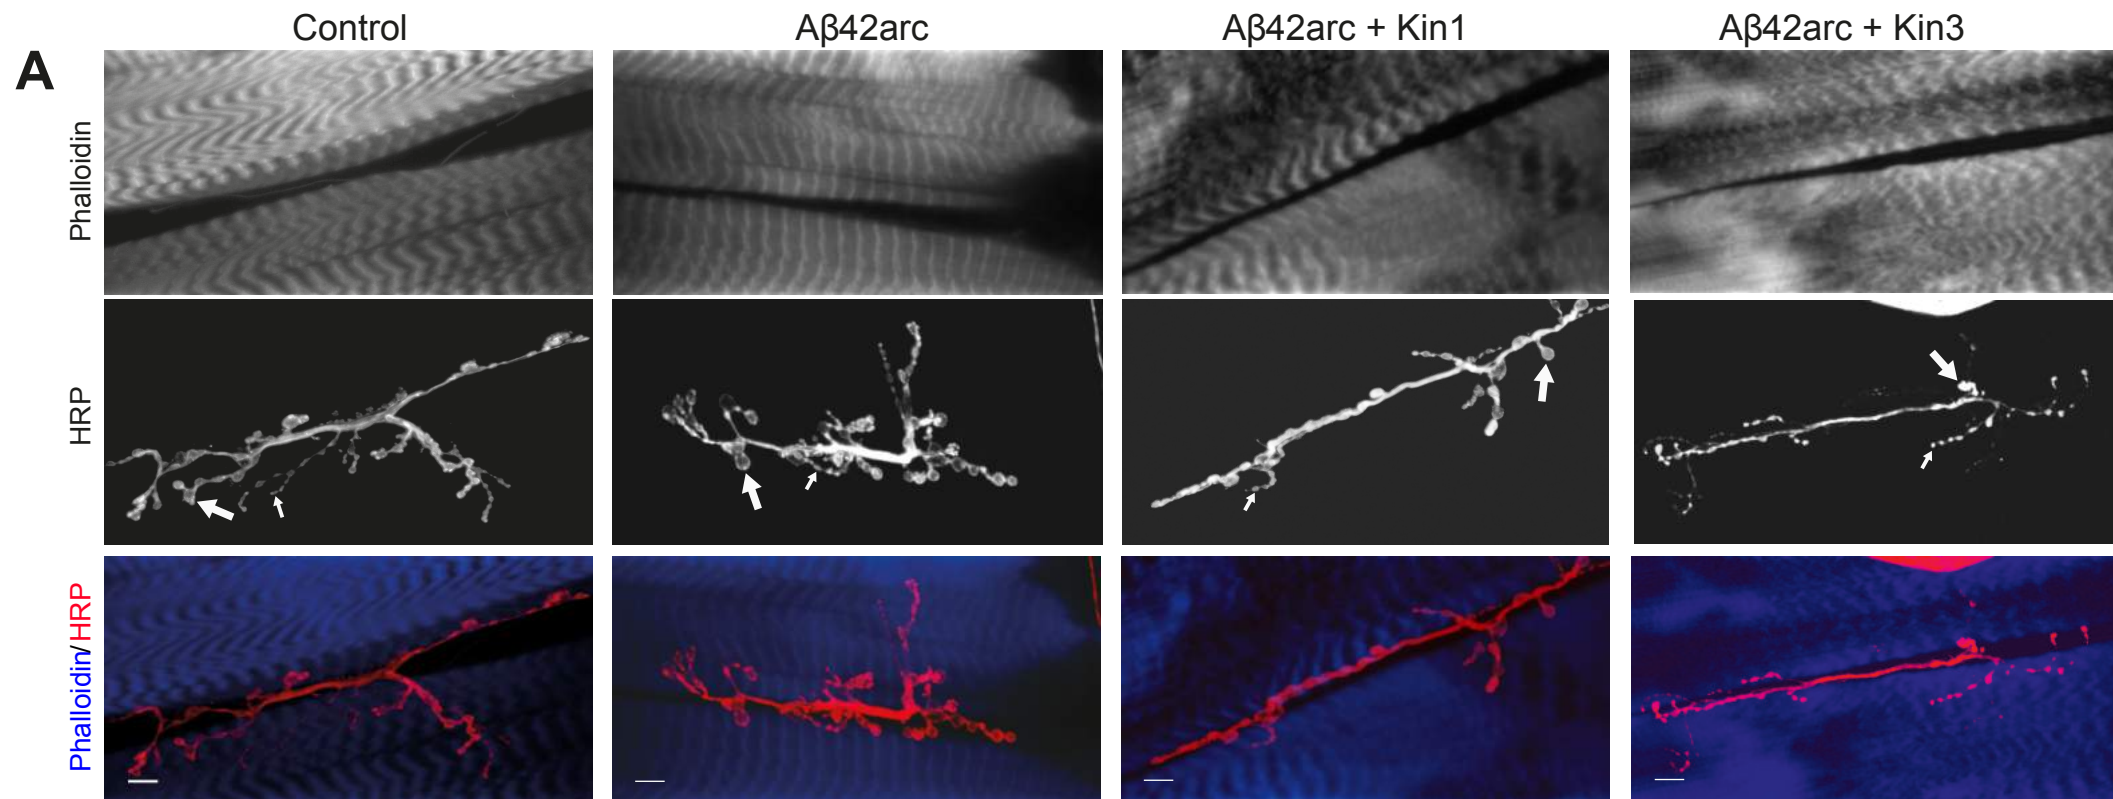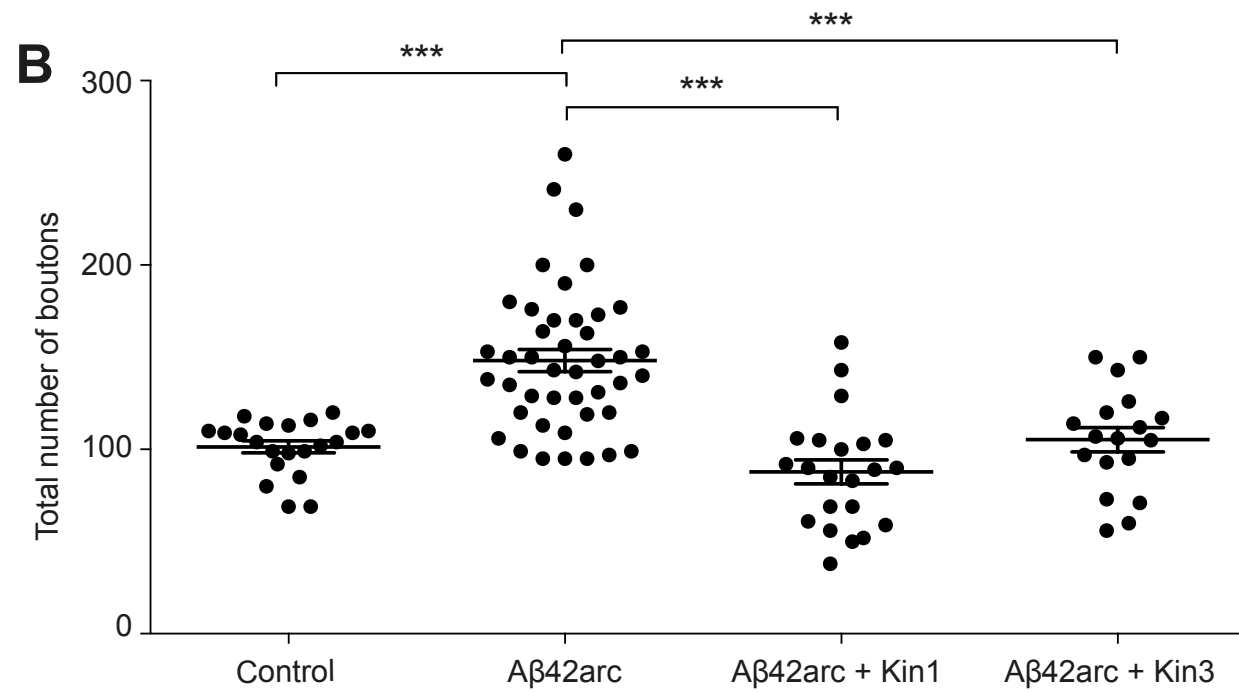



**Figure 5, Francis et al**

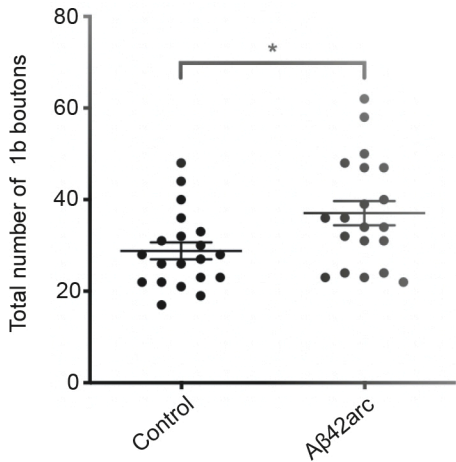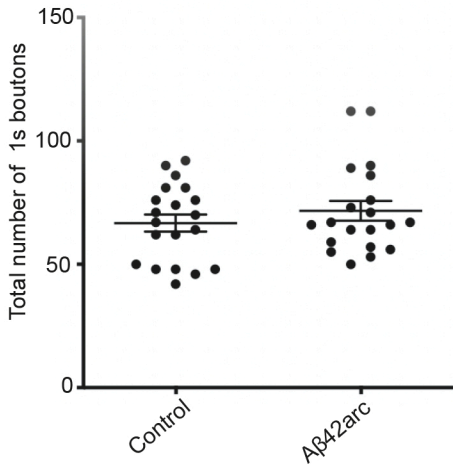

# Figure 6, Francis et al.

bioRxiv preprint doi: <https://doi.org/10.1101/2024.04.23.590704>; this version posted April 23, 2024. The copyright holder for this preprint (which was not certified by peer review) is the author/funder. All rights reserved. No reuse allowed without permission.

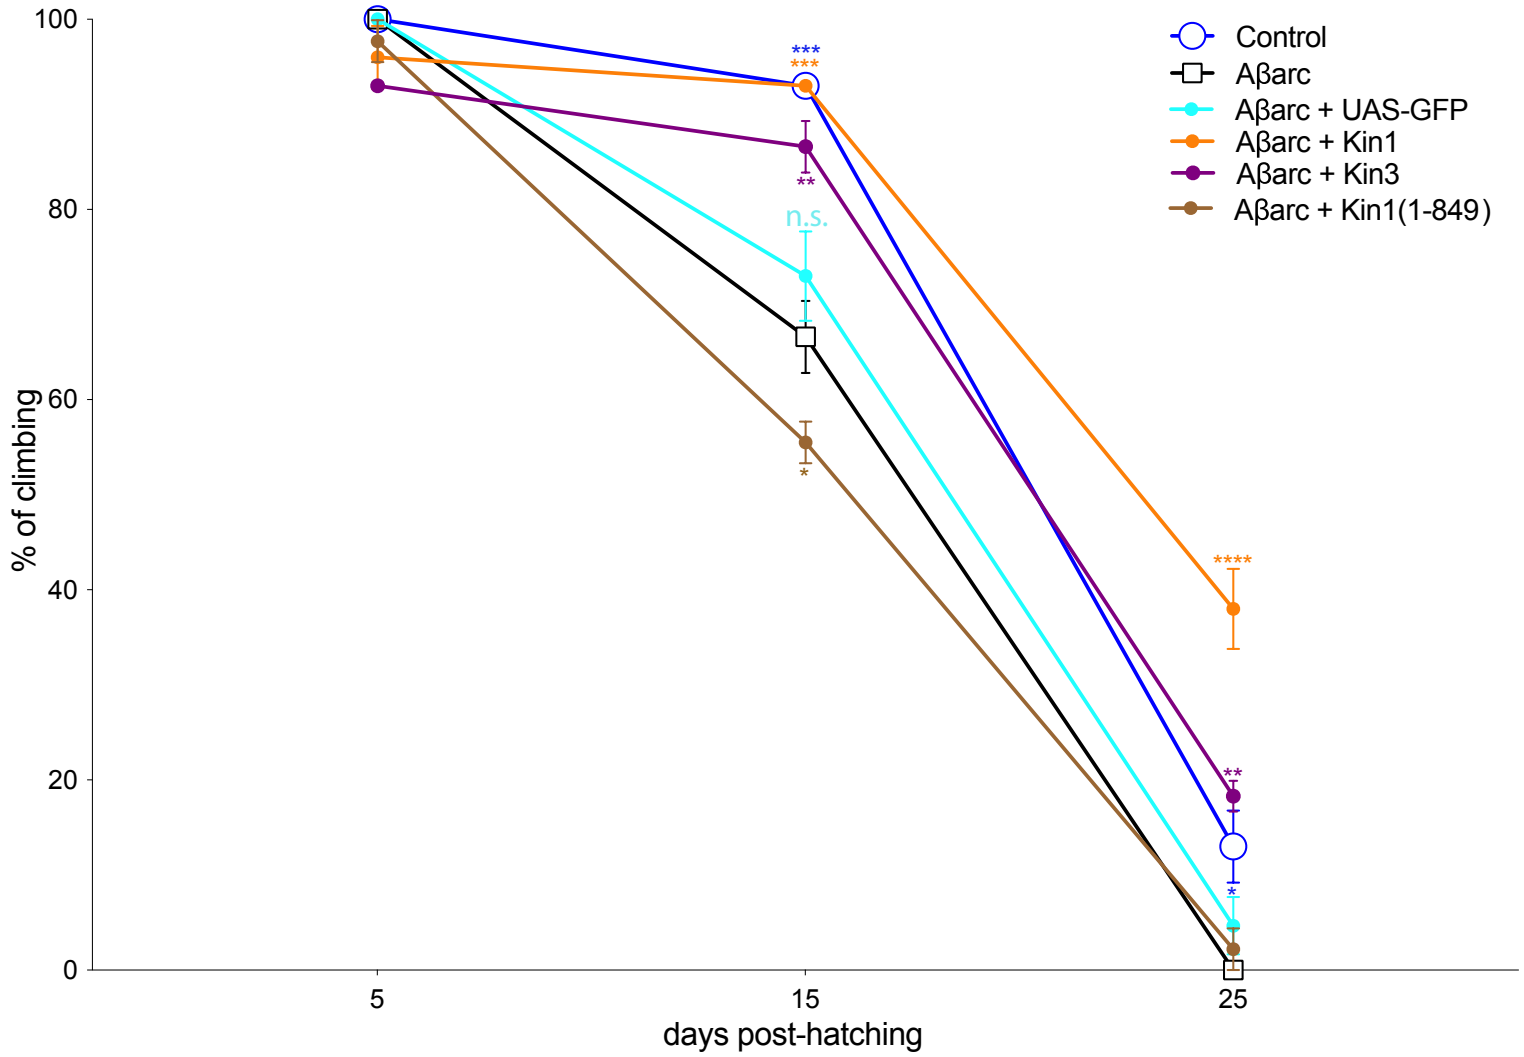

# Figure S1, Francis et al.

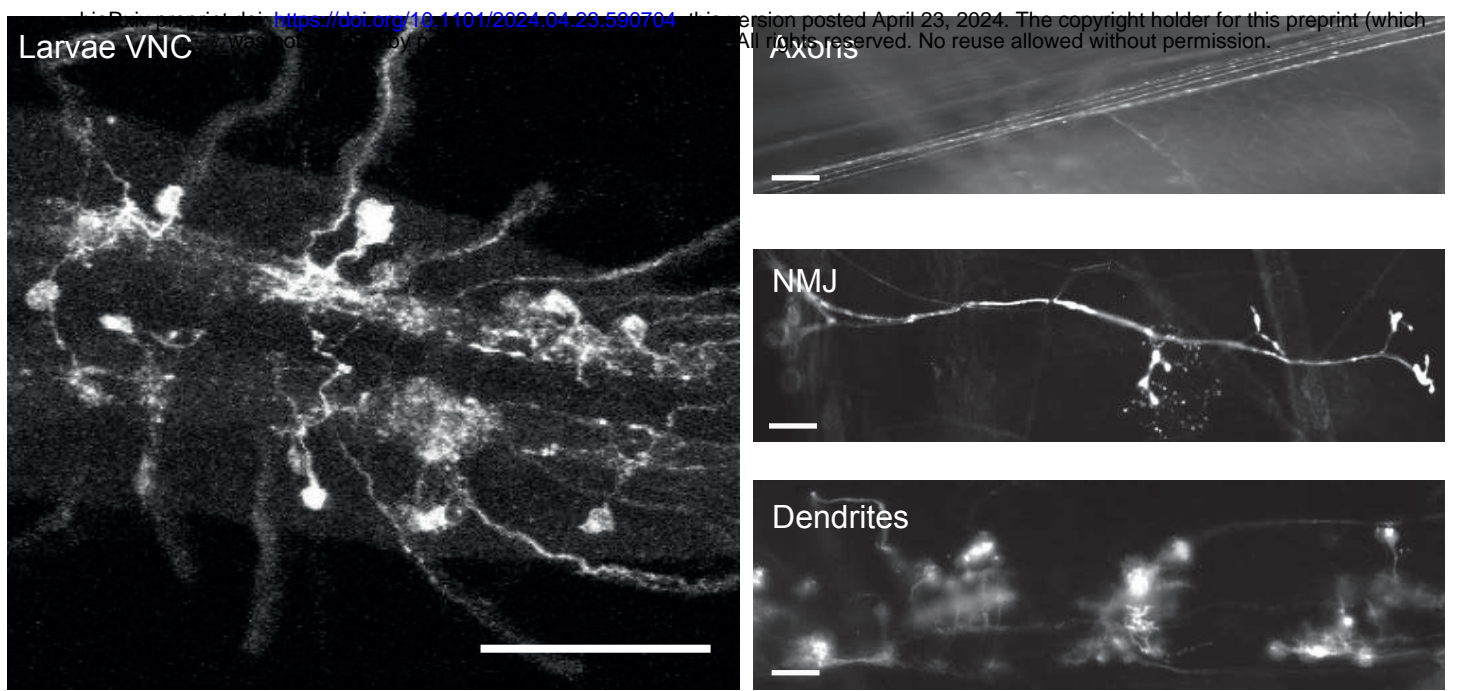

# Figure S2, Francis et al

**A**

DAPI

Beta3 tubulin

DAPI/Beta3 tubulin

Control

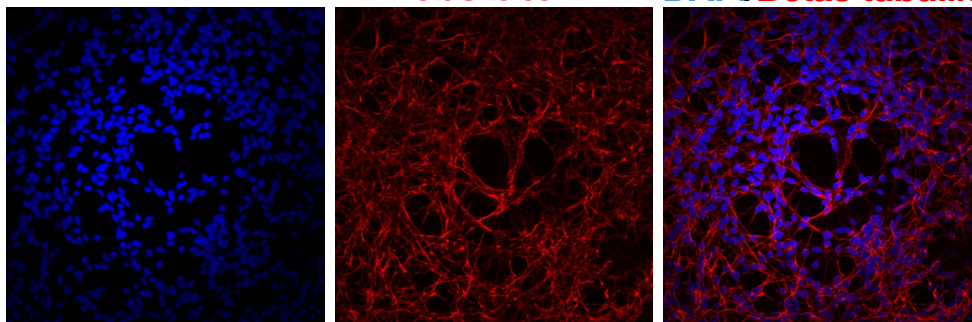

sh KIF1A/5A

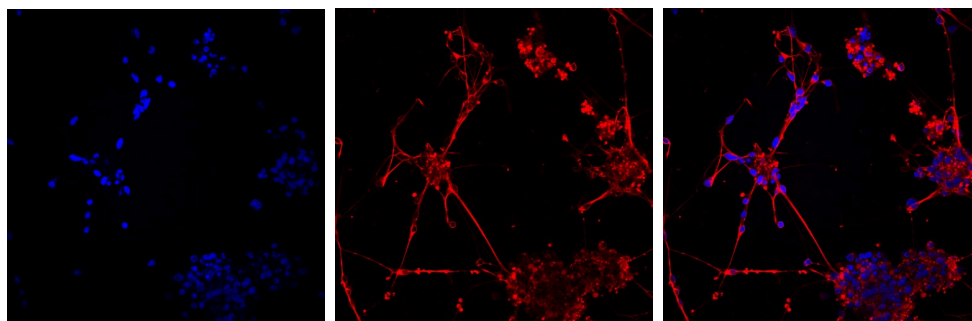

**B**

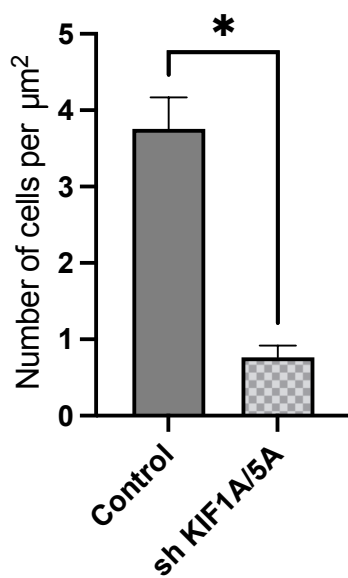



# Figure S3, Francis et al

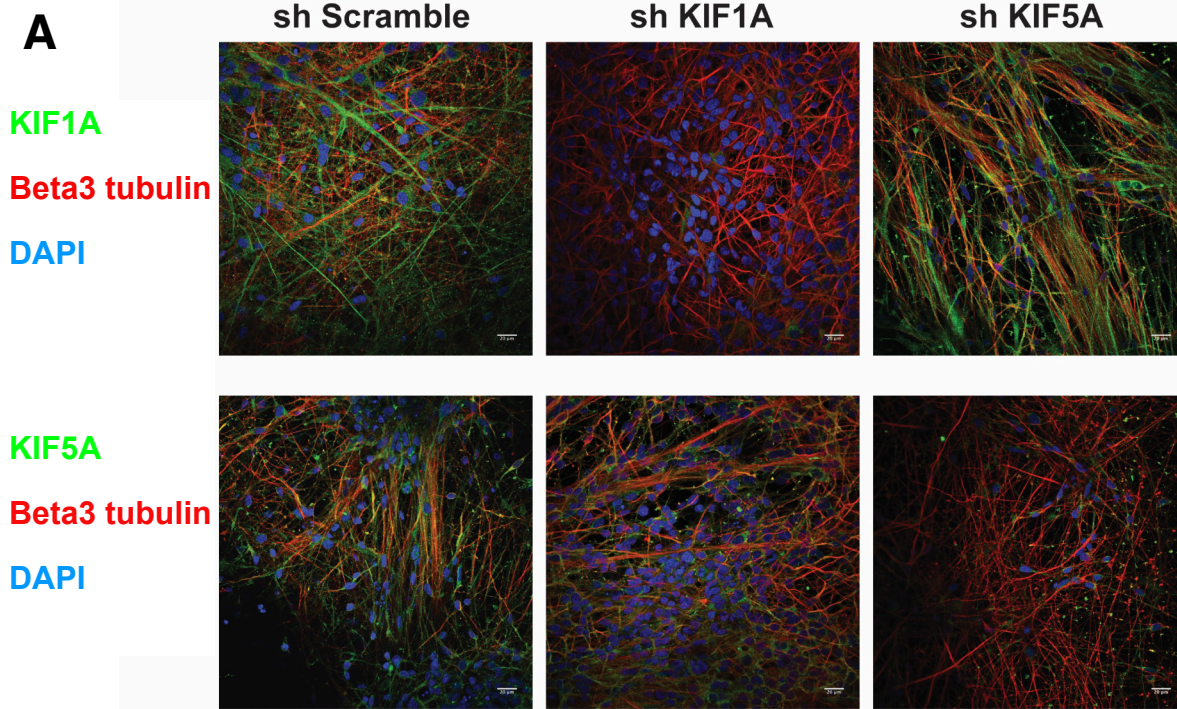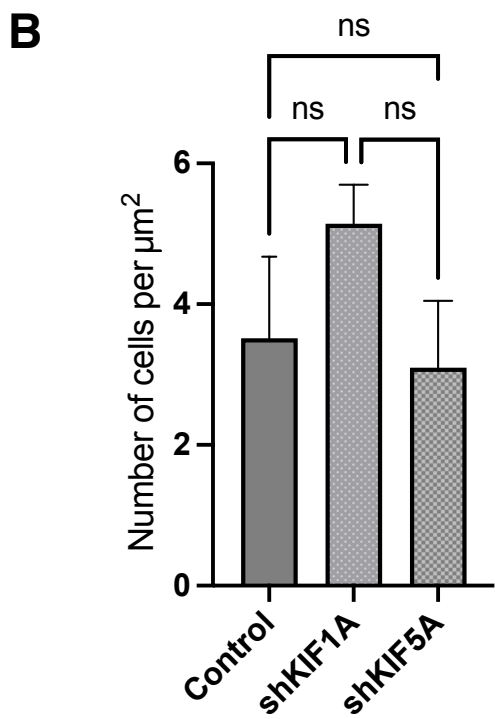

**A**

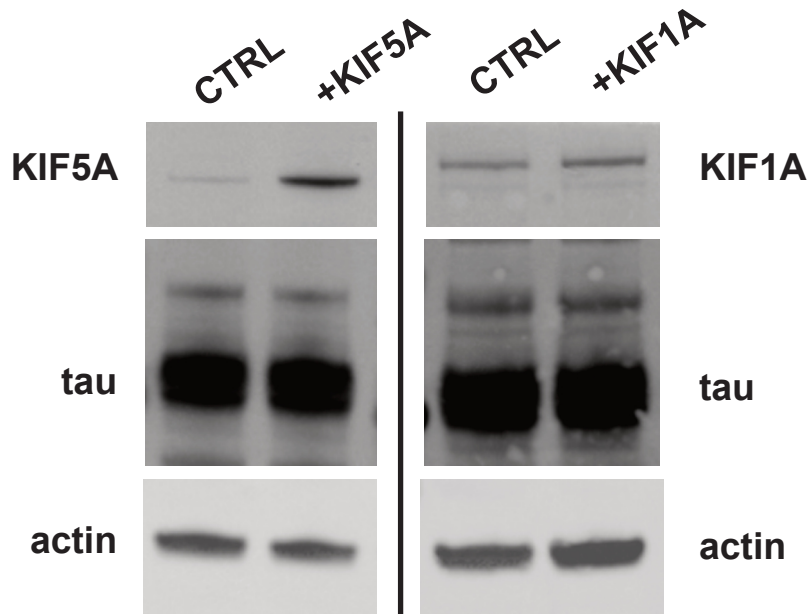

**B**

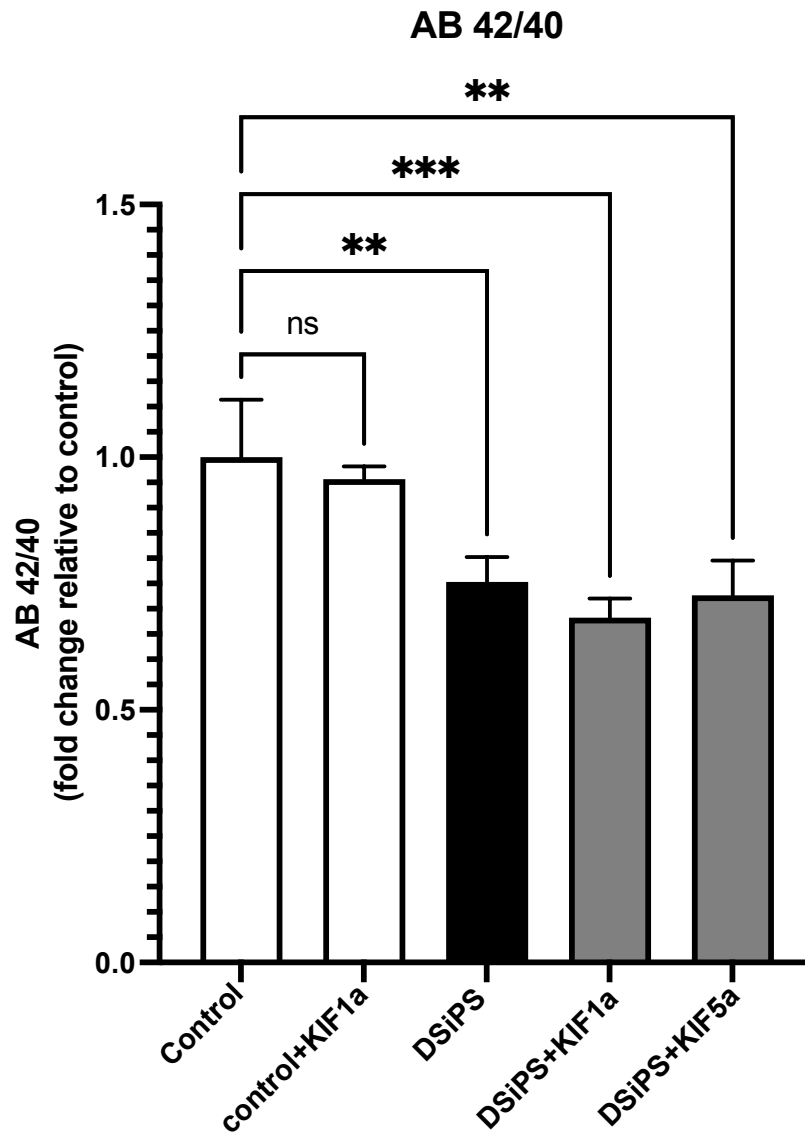

# Figure S5, Francis et al.

**A**

bioRxiv preprint doi: <https://doi.org/10.1101/2024.04.23.590704>; this version posted April 23, 2024. The copyright holder for this preprint (which was not certified by peer review) is the author/funder. All rights reserved. No reuse allowed without permission.

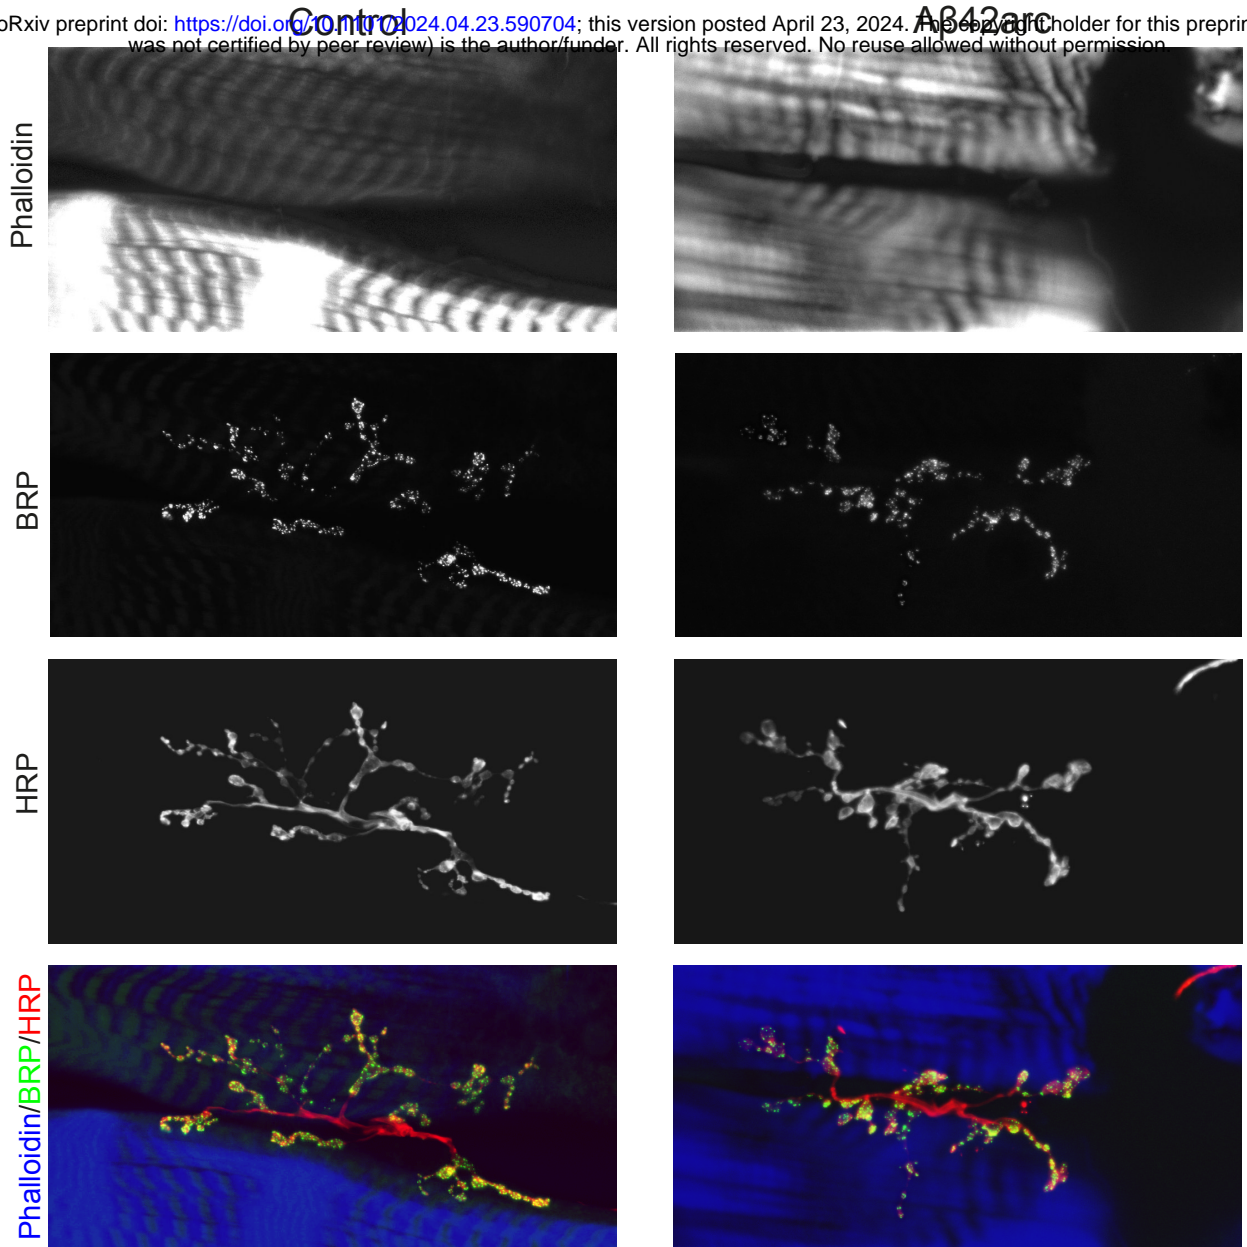

**B**

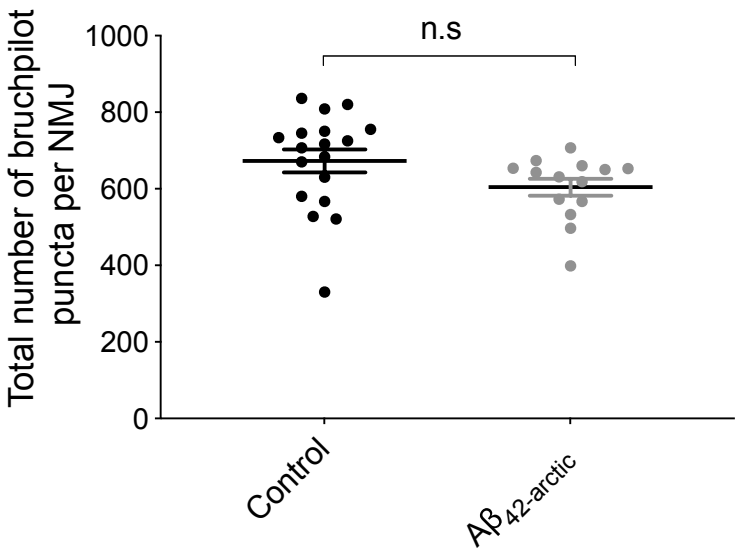

Source: https://www.biorxiv.org/content/10.1101/2024.04.23.590704v1.full.pdf
